# The Genetic Basis of Haploid Induction in Maize Identified with a Novel Genome-Wide Association Method

Haixiao Hu,<sup>\*1</sup> Tobias A. Schrag,<sup>\*1</sup> Regina Peis,<sup>†</sup> Sandra Unterseer,<sup>†</sup> Wolfgang Schipprack,<sup>\*</sup> Shaojiang Chen,<sup>‡</sup> Jinsheng Lai,<sup>§</sup> Jianbing Yan,<sup>\*\*</sup> Boddupalli M. Prasanna,<sup>††</sup> Sudha K. Nair,<sup>\*\*</sup> Vijay Chaikam,<sup>§§</sup> Valeriu Rotarencu,<sup>\*\*\*</sup> Olga A. Shatskaya,<sup>†††</sup> Alexandra Zavalishina,<sup>†††</sup> Stefan Scholten,<sup>\*</sup> Chris-Carolin Schön,<sup>†</sup> and Albrecht E. Melchinger<sup>\*2</sup>

<sup>\*</sup>Institute of Plant Breeding, Seed Science, and Population Genetics, University of Hohenheim, 70593 Stuttgart, Germany, <sup>†</sup>Plant Breeding, School of Life Sciences Weihenstephan, Technische Universität München, 85354 Freising, Germany, <sup>‡</sup>Beijing Key Laboratory of Crop Genetic Improvement and National Maize Improvement Center, and <sup>§</sup>State Key Laboratory of Agrobiotechnology and National Maize Improvement Center, China Agricultural University, 100193 Beijing, China, <sup>\*\*</sup>National Key Laboratory of Crop Genetic Improvement, Huazhong Agricultural University, 430070 Wuhan, China, <sup>††</sup>International Maize and Wheat Improvement Center (CIMMYT), World Agroforestry Centre (ICRAF) House, Gigiri, 00621 Nairobi, Kenya, <sup>†††</sup>CIMMYT, International Crops Research Institute for the Semi-Arid Tropics (ICRISAT) Campus, Patancheru, 502324 Greater Hyderabad, India, <sup>§§</sup>CIMMYT, 56237 Texcoco, Mexico, <sup>\*\*\*</sup>Procera Genetics, Fundulea, 915200 Calarasi, Romania, <sup>†††</sup>P. P. Luk'yanenko Krasnodar All-Russia Research and Development Institute of Agriculture, Russian Academy of Agricultural Sciences, 350012 Krasnodar-12, Russia, and <sup>†††</sup>Department of Genetics, Faculty of Biology, Saratov State University, 410012, Russia

**ABSTRACT** *In vivo* haploid induction (HI) triggered by pollination with special intraspecific genotypes, called inducers, is unique to *Zea mays* L. within the plant kingdom and has revolutionized maize breeding during the last decade. However, the molecular mechanisms underlying HI in maize are still unclear. To investigate the genetic basis of HI, we developed a new approach for genome-wide association studies (GWAS), termed conditional haplotype extension (CHE) test that allows detection of selective sweeps even under almost perfect confounding of population structure and trait expression. Here, we applied this test to identify genomic regions required for HI expression and dissected the combined support interval (50.34 Mb) of the QTL *qhir1*, detected in a previous study, into two closely linked genomic segments relevant for HI expression. The first, termed *qhir11* (0.54 Mb), comprises an already fine-mapped region but was not diagnostic for differentiating inducers and noninducers. The second segment, termed *qhir12* (3.97 Mb), had a haplotype allele common to all 53 inducer lines but not found in any of the 1482 noninducers. By comparing resequencing data of one inducer with 14 noninducers, we detected in the *qhir12* region three candidate genes involved in DNA or amino acid binding, however, none for *qhir11*. We propose that the CHE test can be utilized in introgression breeding and different fields of genetics to detect selective sweeps in heterogeneous genetic backgrounds.

**KEYWORDS** *in vivo* haploid induction; selective sweep; genome-wide association study; population structure; *Zea mays* L

**T**HE double haploid (DH) technology based on *in vivo* haploid induction (HI) has become one of the most important tools in maize breeding during the past decade and is replac-

ing the conventional method of line development by recurrent selfing (Melchinger *et al.* 2013). The success of this new technology became possible, because dozens of maize inducer lines have been developed worldwide (reviewed in Supplemental Material, File S1) which, when used as pollinators, trigger the production of seeds with haploid embryo at an acceptable rate, *i.e.*, >2% (Coe 1959). Double fertilization followed by elimination of the inducer chromosomes in the embryo at later developmental stages (Li *et al.* 2009; Xu *et al.* 2013) as well as parthenogenesis (Sarkar and Coe 1966; Beckert *et al.* 2008) have been proposed as mechanisms for

Copyright © 2016 by the Genetics Society of America  
doi: 10.1534/genetics.115.184234

Manuscript received November 6, 2015; accepted for publication February 16, 2016; published Early Online February 19, 2016.

Supplemental material is available online at [www.genetics.org/lookup/suppl/doi:10.1534/genetics.115.184234/-/DC1](http://www.genetics.org/lookup/suppl/doi:10.1534/genetics.115.184234/-/DC1).

<sup>1</sup>These authors contributed equally to this work.

<sup>2</sup>Corresponding author: University of Hohenheim, Fruwirthstrasse 21, 70593 Stuttgart, Germany. E-mail: melchinger@uni-hohenheim.de

HI in maize, but a proof of these hypotheses requires profound knowledge about the genetic and physiological factors underlying this phenomenon.

All previous QTL mapping studies for unraveling the genetic architecture of HI detected a major QTL on chromosome 1 (Röber 1999; Beckert *et al.* 2008; Prigge *et al.* 2012). The most comprehensive study with four biparental populations (Prigge *et al.* 2012) mapped this QTL, termed *qhir1*, to bin 1.04 and hypothesized that it is required for HI, but QTL positions and 1-LOD support intervals differed substantially among populations. In another study with population 1680 × UH400, Dong *et al.* (2013) fine mapped a 3.57-Mb region between markers *umc1917* and *bnlg1811*, which targeted the QTL *qhir1* and identified a 243-kb region with significant effect on HI. Both studies employed inbred UH400 as inducer parent, which limits the inference on HI to this specific inducer line. Moreover, in view of the uncertainties associated with the exact QTL position, concentrating the fine mapping on a very narrow region carries the risk of overlooking important adjacent segments. Therefore, our objectives were to (i) detect selective sweeps for HI in a worldwide collection of inducers (cases) and noninducers (controls) by a genome-wide association study (GWAS); (ii) identify a candidate region(s) underlying *qhir1*; (iii) validate the fine-mapping results reported by Dong *et al.* (2013) in a broader set of genetic material with an independent, complementary approach; and (iv) resequence the *qhir1* region for identification of candidate genes involved in HI in maize. For application of GWAS, we developed a novel method that can deal with almost perfect confounding between genetic ancestry and trait expression.

## Results and Discussion

We genotyped a worldwide collection of 53 maize inducer lines from 29 breeding programs (Table S1) for 56,110 SNPs on the Illumina MaizeSNP50 Bead Chip (50k SNP chip; Ganai *et al.* 2011). From various public and private databases, we gathered marker data obtained with this SNP chip for 1482 inbred lines (File S2) chosen to represent the global genetic diversity of maize from seven germplasm groups. To the best of our knowledge, these lines possess zero or very low HI rate, and therefore, are subsequently referred to as noninducers. To balance the number of lines within each noninducer group with the number of inducers, we created a core set of 363 lines using established methods (Liu and Muse 2005). The core set consisted of the 53 inducers and 310 noninducers (50 lines from each noninducer germplasm group with two groups having fewer than 50 lines, Table S2).

Principal component analysis (PCA) of the core set clearly separated the group of inducers from all seven germplasm groups of noninducers, and cluster analysis revealed close relatedness among subsets of the 53 inducers (Figure 1). The clear separation between inducers and noninducers was corroborated by plots of the first two principle components from

separate PCAs of inducers against all lines from each germplasm group of the 1482 noninducers (Figure S1).

To identify genomic segments associated with HI, we performed a GWAS with various established methods for case-control association analysis (Purcell *et al.* 2007; Wellcome Trust Case Control Consortium 2007) and detection of selective sweeps (Voight *et al.* 2006; Tang *et al.* 2007; Chen *et al.* 2010; Fariello *et al.* 2013). The standard case-control association analysis (Purcell *et al.* 2007) detected no striking signals and showed a high genomic inflation factor ( $\lambda = 33.3$ , Figure S3, A and B). Likewise, several popular methods for identifying selective sweeps in humans and animals (Vitti *et al.* 2013) failed to detect clear signals (Figure S3, C–F). Neither the within-population test applied to the 53 inducers using the iHS score (Voight *et al.* 2006) nor the between-population test treating the 53 inducers and 310 noninducers as two populations and employing the Rsb score (Tang *et al.* 2007) yielded significant signals. In addition, we applied two population differentiation-based tests that implemented different algorithms. Using the hapFLK score (Fariello *et al.* 2013) based on the differences of haplotype frequencies between populations, we detected a few significant signals on chromosome 9. Likewise, the cross population composite likelihood ratio (XP-CLR) score (Chen *et al.* 2010) yielded high XP-CLR values on chromosomes 1 and 6. However, further analyses of haplotypes in these regions detected with either method revealed that the major haplotypes found in the inducer group were present only in a subset of them (Figure S4), indicating that these regions are not required for HI.

Although the various methods for GWAS differ in their rationale, their common assumption is that the individuals under investigation are largely unrelated to each other (Voight *et al.* 2006; Purcell *et al.* 2007; Tang *et al.* 2007; Chen *et al.* 2010; Fariello *et al.* 2013). However, in this study, we encountered a different data structure, in which the cases (inducers) are closely related with each other because they share a common ancestor (Stock6 or a later version of it maintained by the Maize Stock Center; Lawrence *et al.* 2005) not more than six breeding cycles distant, whereas the controls (noninducers) can be considered largely unrelated among themselves and with the cases (inducers). Thus, this resulted in almost perfect confounding of population structure with cases and controls (Figure 1; Figure S1), which represents an unsolved problem for all GWAS approaches mentioned above.

To solve this problem, we developed a novel approach, termed conditional haplotype extension (CHE) test, in which the cases are first scanned for detection of long haplotypes fixed in this set of genotypes. The rationale behind this step is that linkage drag results in long segments of DNA being transferred during trait introgression (Sabeti *et al.* 2002). In the second step, a formal statistical test based on the Clopper–Pearson confidence interval (Clopper and Pearson 1934) is applied for testing the hypothesis that transmission of the detected haplotypes through known pedigrees of the

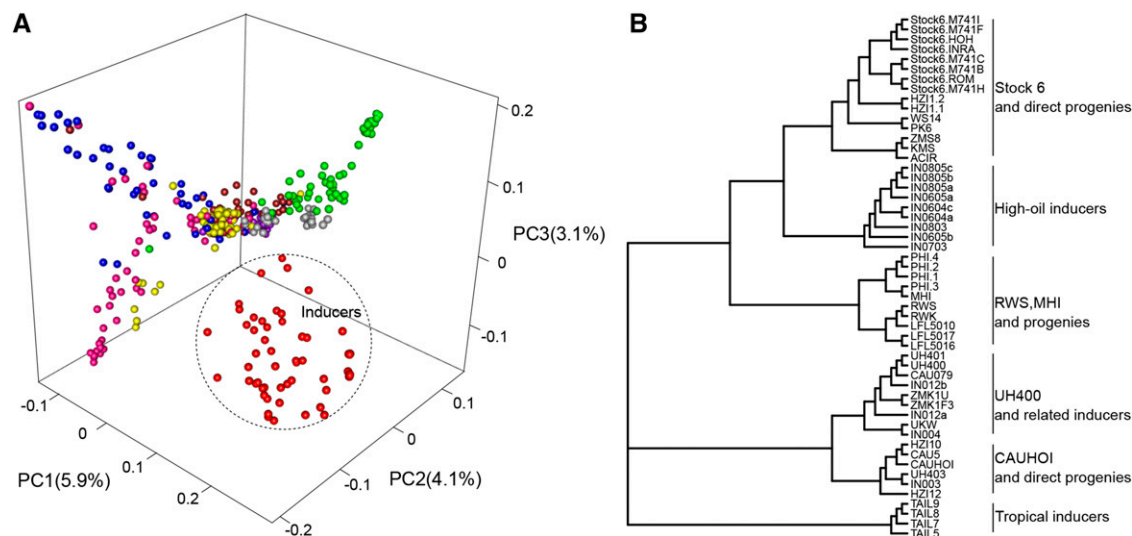

**Figure 1** Genetic diversity between inducers and a worldwide germplasm collection of noninducers in maize. (A) Genetic structure of inducers in comparison with noninducers revealed by the first three principal components obtained from PCA with 29,533 SNPs of a core set of 53 inducers and 310 noninducers from worldwide germplasm. Different germplasm groups are shown in different colors (red, inducers; green, EUF; pink, EUD; blue, SS; yellow, NSS; purple, TST; brown, DCN; and gray, MIS). (B) Neighbor-joining tree of 53 maize haploid inducers.

cases cannot be explained by chance alone (described in detail in File S3).

In the first step, the top 10 segments fixed in all 53 inducers (cases) exceeded 1 Mb in length (Figure 2, Table 1). In the second step, among 19 inducers (described in File S3) derived from matings between inducers and noninducers, only the longest segment on chromosome 1 and another shorter segment on chromosome 6 were significant at  $P < 0.01$  (Figure 2, Table 1). The segment identified on chromosome 1 spanned 3.97 Mb on the physical map, overlapped with all support intervals of *qhir1* from four QTL mapping populations (Figure 3, A–C; Prigge *et al.* 2012), and was denoted *qhir12*. Adjacent to this region was a shorter 0.54-Mb segment denoted *qhir11* (Figure 2B), which harbored the 243-kb region fine mapped by Dong *et al.* (2013) and was fixed in all inducers and significant in the Clopper–Pearson test (Table 1); for these reasons, this segment was also considered in our subsequent analyses.

The *qhir12* segment was not detected by Dong *et al.* (2013), as it lies 985 kb outside (downstream) the marker interval originally chosen for fine mapping, but their results from cross 1680  $\times$  UH400 provide strong evidence in support of a second region linked to their 243-kb fine-mapped segment, because the effect of the entire *qhir1* region found in the  $F_2$  generation (see figure 2 in Dong *et al.* 2013) was more than twice the effect of the 243-kb segment segregating in  $F_3$  progeny of recombinant  $F_2$  individuals (see figure 3 in Dong *et al.* 2013). Thus, the 243-kb segment making up about half of the *qhir11* segment detected in our study, explained less than one quarter of the genetic variance of HI attributable to QTL *qhir1*.

On chromosome 6, a 1.22-Mb segment was fixed among all inducers and significant in the Clopper–Pearson test (Table

1). Consequently, this segment may also have an effect on HI, but the evidence was not as strong as for *qhir12*, because 10% of the controls also harbored this segment (Table 1). For this reason and due to the prominent role of QTL *qhir1* in previous studies, we decided to focus subsequently on genomic segments detected on chromosome 1.

To determine whether both or only one of these regions harbor the gene(s) required for HI, we traced the transmission of both segments in the pedigree of all 53 inducers and reconstructed the respective recombination events (Lai *et al.* 2010) in a 50.34-Mb genomic region denoted as *qhir1*-combined support interval (CSI), which covered the 1-LOD support intervals of *qhir1* from four QTL mapping populations (Prigge *et al.* 2012) and contained the *qhir11* and *qhir12* segments (Figure 3A). Based on the 1123 SNP markers of the 50k SNP chip found in this region, both *qhir11* and *qhir12* were regarded as identical by descent among the 53 maize inducers and derived from one of the various versions of Stock6 (Figure 3C). To corroborate this result with even higher marker density, we genotyped a representative subset of 17 inducers (indicated in Table S1) with a 600k SNP chip described by Unterseer *et al.* (2014), which included 15,602 SNP markers in the *qhir1*-CSI. While the segment *qhir12* had a single haplotype across all inducers, two haplotypes were observed for *qhir11* (Figure 3D, Figure S5). This indicates that the minor haplotype allele of *qhir11* together with its neighbor segments present in Stock6.M741H and Stock6.ROM either did not originate from the original version of Stock6 (*i.e.*, Stock6.M741F; Lawrence *et al.* 2005) or was altered due to genomic rearrangements caused by active (retro-)transposons. This haplotype allele, which has still high congruency with the major haplotype allele of *qhir11* within the 243-kb fine-mapped fragment, was also found in

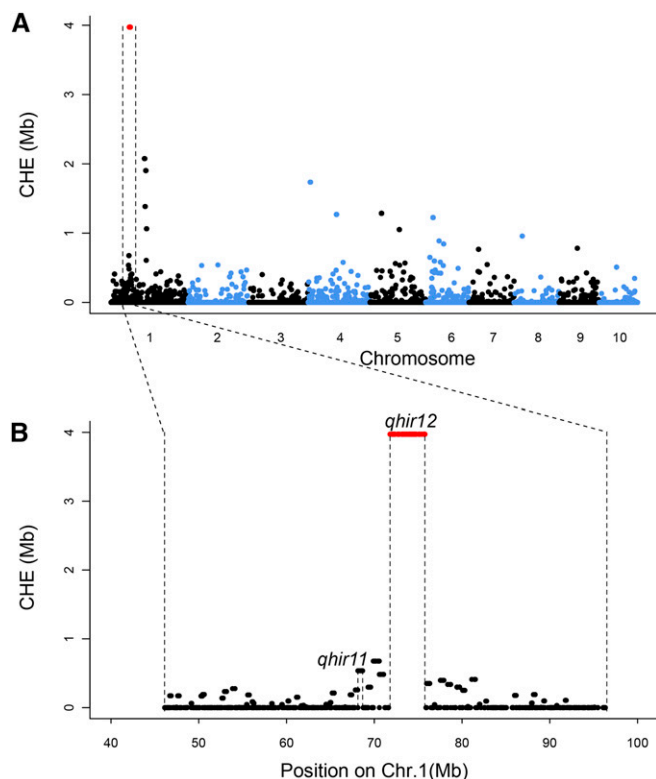

**Figure 2** CHE scores for *in vivo* haploid induction (HI). (A) Genome-wide Manhattan plot. (B) Regional Manhattan plot for the combined support interval of QTL *qhir1* (*qhir1*-CSI) reported by Prigge *et al.* (2012). The y-axis shows the CHE score of each SNP marker in megabases (Mb), which refers to the maximum length of the haplotype extended from a focal SNP independently in both directions. In our study, the extended haplotype is required to be fixed among all inducers. The genome-wide maximum of the CHE score is indicated in red.

two noninducers, Mo1W and Tx303 lacking the *qhir12* haplotype allele common to all 53 inducers. Since HI rates of these two lines were in the range of spontaneously occurring haploids in maize (Table S3; Chase 1969), we conclude that the minor haplotype allele of *qhir11* is not sufficient for HI in maize. However, this does not allow conclusions to be drawn on the effect of the major haplotype allele of *qhir11* and its 243-kb segment identified by Dong *et al.* (2013) via use of inducer UH400. Thus, we propose to further investigate the effect of *qhir11* and *qhir12* on HI for example by comparing the HI of near-isogenic lines differing in one or both of these segments or by analyzing selfed progenies of recombinants that segregate for one segment while the other segment is fixed either for presence or absence of the HI-effective haplotype allele.

Since *qhir11* and *qhir12* were identified with a selective sweep approach, selection for characters other than HI could also explain our findings. During development of the 19 progeny inducers that were subjected to the Clopper–Pearson test, selection was primarily for high HI rate and good expression of the *R1-nj* embryo-color marker and of the *B1* stalk-color marker. The *R1-nj* marker has been mapped to chromosome 10 and the *B1* marker to chromosome 2. Thus, selection for these markers cannot explain fixation of *qhir11* and *qhir12*

on chromosome 1. In addition, not all 53 inducers analyzed for selective sweeps carry these color markers. For example, inducers ACIR, Stock6.M741B (*R1-r*), Stock6.M741C (*R1-r*), and Stock6.M741F (*R1-g*) do not carry the *R1-nj* marker and inducer IN605a does not carry the *B1* marker, but these inducers still harbor both the *qhir11* and *qhir12* segments. Altogether, these arguments provide strong evidence that fixation of *qhir11* and *qhir12* among the inducers was exclusively attributable to selection for HI.

To locate candidate genes for HI, we searched for mutated coding sequences in these two segments by comparing resequencing data of inducer CAU5 (depth of  $11.22\times$  coverage) with sequences of 14 noninducers important in global maize breeding (Table S4). CAU5 was chosen due to its close relationship with many other inducers, because both its parents (CAUHOI and UH400) have HI ability and served as parents or grandparents in development of new inducers. In the genic regions of *qhir11* and *qhir12*, we found 49 amino acid changes (AACs), 20 insertions or deletions (InDels), and 3 structural variants comparing the inducer to the noninducer sequences (Table S5), which involved 44 of all genes in these two regions. For 14 of these genes (Table S6), annotations were available either from Interpro (Mitchell *et al.* 2014) or UniProt (UniProt Consortium 2014). Three of these genes in the *qhir12* region, GRMZM2G137502 and GRMZM2G135834, each encoding a DNA binding protein, and GRMZM2G096682, encoding an amino acid binding protein, constitute intuitive candidates for triggering HI in maize. In agreement with both hypotheses for *in vivo* HI in maize (Sarkar and Coe 1966; Beckert *et al.* 2008; Li *et al.* 2009; Xu *et al.* 2013) and characters associated with HI (Prigge *et al.* 2012; Qiu *et al.* 2014), their mutant versions might be involved in chromosomal segregation distortion. Besides the structural candidates identified in the coding sequences of these genes, we cannot exclude that the causal mutation is located in a regulatory region as has been shown for other genes (*e.g.*, Hanson *et al.* 1996; Clark *et al.* 2006; Salvi *et al.* 2007). In any case, reverse genetic studies such as RNA interference (Zuo *et al.* 2015) or targeted mutagenesis (Char *et al.* 2015; Svitashv *et al.* 2015) are needed to verify candidate genes. For *qhir11*, no intuitive candidates were found (Table S6).

Modern inducer lines have considerably higher HI rates than the Stock6 founders (Table S1) due to the effect of multiple QTL as indicated by QTL mapping results with various inducers such as Stock6 (Röber 1999), PK6 (Barret *et al.* 2008), and UH400 (Prigge *et al.* 2012). Different from these studies, we aimed at detecting the subset of QTL that is common to all inducers in maize, especially those QTL necessarily required for HI and not just for modifying its rate. By searching with our CHE approach for genomic regions fixed in a worldwide collection of inducers, we obtained evidence in support of the hypothesis of Prigge *et al.* (2012) that QTL *qhir1* is required for HI.

The CHE test developed in this study closes a gap in GWAS, when population structure is strongly confounded with the

**Table 1** Characterization of 11 genomic segments on the basis of SNP data from the 50k SNP chip

| Chr. | Start position (bp)          | End position (bp)            | CHE score (bp) | Number of SNPs | Frequency in NI (%) | CHE test | Segment name  |
|------|------------------------------|------------------------------|----------------|----------------|---------------------|----------|---------------|
| 1    | SYN4966<br>71,795,509        | PZA00714.1<br>75,768,235     | 3,972,726      | 90             | 0.0                 | **       | <i>qhir12</i> |
| 1    | PZE-101114336<br>130,455,842 | PZE-101114759<br>132,531,443 | 2,075,601      | 5              | 63.0                | NS       |               |
| 1    | PZE-101114797<br>132,849,879 | PZE-101115057<br>134,234,309 | 1,384,430      | 3              | 74.8                | NS       |               |
| 1    | PZE-101115217<br>135,276,739 | PZE-101115612<br>137,179,441 | 1,902,702      | 7              | 47.9                | NS       |               |
| 1    | PZE-101115912<br>138,641,589 | PZE-101116234<br>139,704,986 | 1,063,397      | 11             | 63.6                | NS       |               |
| 4    | PZE-104010475<br>7,618,125   | PZE-104010863<br>9,353,851   | 1,735,726      | 6              | 88.4                | NS       |               |
| 4    | PZE-104057913<br>110,071,345 | PZE-104058294<br>111,341,426 | 1,270,081      | 19             | 75.5                | NS       |               |
| 5    | PZE-105051178<br>44,623,312  | PZE-105051594<br>45,909,320  | 1,286,008      | 27             | 53.9                | NS       |               |
| 5    | PZE-105087655<br>114,100,330 | PZE-105087886<br>115,151,762 | 1,051,432      | 16             | 69.2                | NS       |               |
| 6    | SYNGENTA12397<br>28,127,747  | PZE-106010794<br>29,352,618  | 1,224,871      | 18             | 10.0                | *        |               |
| 1    | PZE-101081177<br>68,134,633  | SYN25793<br>68,670,617       | 535,984        | 16             | 2.7                 | *        | <i>qhir11</i> |

The 10 genomic segments with the highest CHE scores were obtained from a genome-wide scan of 53 inducers with the CHE test. One additional segment (*qhir11*) harbors the 243 kb segment fine-mapped by Dong *et al.* (2013). NI, noninducers; \*\* $P < 0.001$ , \* $P < 0.01$ ; NS, not significant.

occurrence of cases and controls. This situation is often encountered in crop species, if major genes for resistance and other agronomic important traits are transferred from a wild ancestor to elite germplasm by introgression breeding (see examples in Table S7). However, this problem exists also in genetic studies with humans and animals (Laird *et al.* 2005) if a novel allele is rapidly spread by matings of the original carrier to other individuals from various populations. Thus, the CHE test promises to expand the collection of GWAS methods to applications where ancestry and trait expression are highly confounded.

## Materials and Methods

### Germplasm

In this study, a genotype is referred to as an inducer (case) if it has a HI rate of at least 2% (Coe 1959). We collected a total of 53 maize inducers originating from 29 different breeding populations in China, France, Germany, India, Mexico, Moldova, Romania, Russia, and the United States (Table S1). All inducers were highly inbred and developed from different types of source populations by recurrent selfing for at least five generations accompanied by evaluation and selection for a high HI rate. Subsequently, these inducers were maintained by selfing or sib mating to warrant a high level of uniformity and homozygosity. Information about their pedigree and HI rate were obtained either from the literature or by personal communication with breeders from the institutions providing the materials. The pedigree of all inducers (Table S1) together with their noninducer parents (if known) were plotted (Figure S2) using the package pedigraph v2.4 (Garbe and Yang 2008).

In addition, we included molecular data from 1482 inbred lines (File S2) selected for good marker quality from a total of 1963 inbred lines available from public breeding programs or databases. These lines are subsequently referred to as non-inducers and are assumed to possess zero or very low HI rate. If some of these controls have been misclassified and possess HI ability, in contrast to our assumption, this has no effect on the first step of our CHE approach and would merely reduce the power of the test in the second step but would not result in false positives. However, presence of HI in germplasm not selected for this trait is very unlikely for the following reasons: (i) *In vivo* HI in maize is associated with endosperm abortion, embryo abortion, and segregation distortion (Prigge *et al.* 2012; Xu *et al.* 2013). Maintenance breeding of inducers requires continuous selection for HI to counteract the strong negative effects on fitness of this character (Melchinger *et al.* 2016). Since all control inbreds have been bred for good agronomic performance, and were not selected for HI, it is extremely unlikely that HI is present. (ii) Among the seven noninducers tested for HI (Table S3), none of them showed HI rates significantly different from zero.

Based on breeders' knowledge or pedigree information, these lines were assigned to seven germplasm groups: European Dent (EUD,  $N = 399$ ), European Flint (EUF,  $N = 408$ ), Stiff Stalk (SS,  $N = 123$ ), Non-Stiff Stalk (NSS,  $N = 193$ ), Tropical and Subtropical (TST,  $N = 299$ ), Domestic China (DCN,  $N = 33$ ), and Miscellaneous (MIS,  $N = 27$ ) lines comprising Teosinte ( $N = 10$ ), Popcorn ( $N = 9$ ), and Sweet Corn ( $N = 8$ ) genotypes.

### Genotyping

After DNA extraction, the 53 inducers were genotyped with the Illumina MaizeSNP50 BeadChip (Ganal *et al.* 2011),

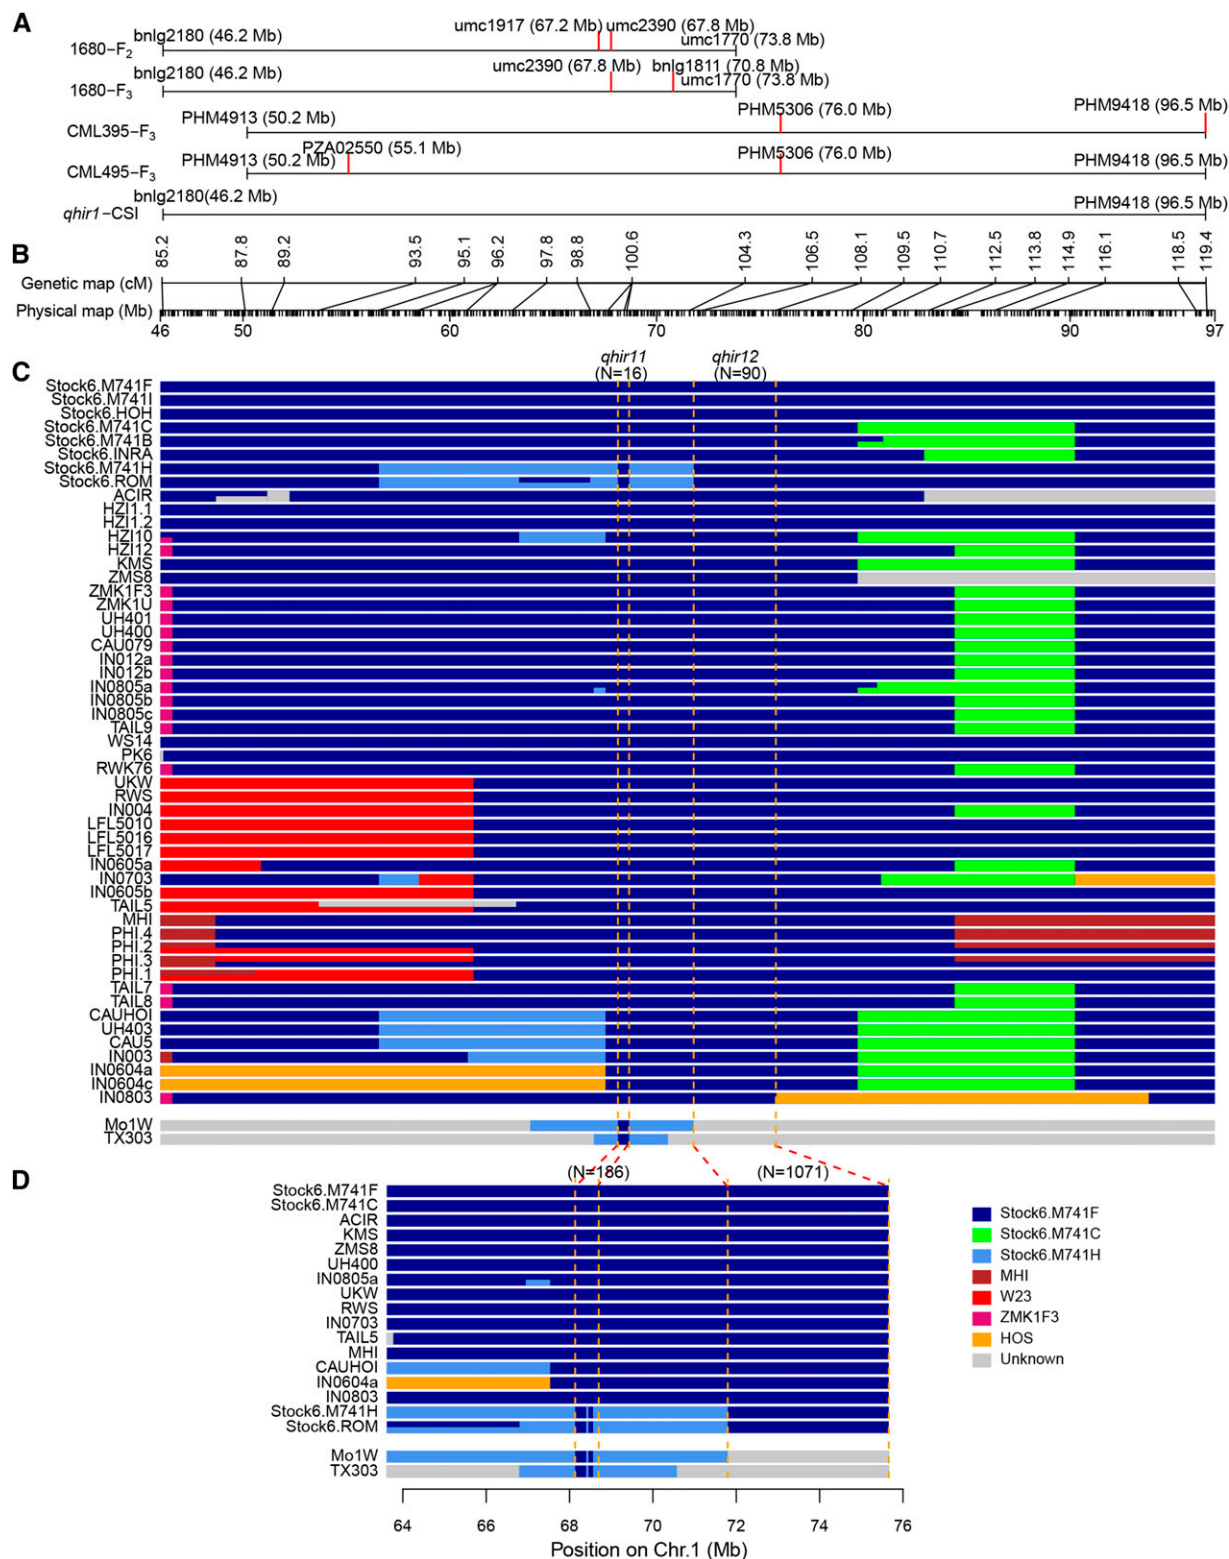

**Figure 3** Graphical genotypes of 53 inducers and two noninducers (Mo1W and Tx303). (A) Support intervals of QTL *qhir1* in four segregating populations reported by Prigge *et al.* (2012). Red bars indicate flanking markers of QTL *qhir1* in the respective mapping populations. (B) Physical and genetic maps of the *qhir1*-CSI. (C) Graphical genotypes indicating the origin of genomic fragments of 53 inducers from their founders in the *qhir1*-CSI region based on the 50k SNP chip. *N* indicates the number of markers in respective regions. (D) Zooming in a subregion of *qhir1*-CSI that shows the graphical genotypes of 17 inducers from different breeding populations selected from the 53 inducers and genotyped with the 600k SNP chip.

referred to as 50k SNP chip. Genotypic data collected with the same SNP chip for the 1482 noninducers were obtained for 834 lines from our own database, for 335 lines from Yang *et al.* (2011) and for the remaining 313 lines from Cook *et al.* (2012) and Ganai *et al.* (2011). Quality control of the SNP data encompassed two steps for screening of markers and genotypes. Markers were selected if (i) their call frequency exceeded 0.80 across all inducers and 0.90 across all noninducers and (ii) heterozygosity was <10% across all inducers and <5% across all noninducers. Noninducer genotypes were included if (i) their call rate exceeded 95% and (ii) their heterozygosity across all markers was <5%. A total of 40,572 SNPs and 1482 noninducers met these criteria and were used for further analyses together with the 53 inducers. The 1.05% missing marker data in all 1535 lines were subsequently imputed with software Beagle 3.3.2 (Browning and Browning 2007).

In addition to genotyping with the 50k SNP chip, 17 inducers (indicated in Table S1) were chosen for genotyping with the Affymetrix Axiom Maize Genotyping Array (Unterseer *et al.* 2014), referred to as 600k SNP chip. These 17 inducers were chosen to represent most of the genetic diversity among all 53 inducers according to pedigree information. Additionally, two noninducer inbred lines, Mo1W and Tx303, were also genotyped with this 600k SNP chip.

### Genetic structure analyses

Genetic structure analyses of inducers and noninducers were based on a subset of 29,553 markers obtained after excluding 11,019 Syngenta markers from the entire set of 40,572 SNPs. This was taken as a precaution measure to minimize a possible ascertainment bias, because the Syngenta markers were specifically selected for polymorphism between B73 and Mo17 (Ganai *et al.* 2011). First, we determined with software PowerMarker v3.25 (Liu and Muse 2005) a subset of 50 lines capturing maximum diversity for each of the five germplasm groups (EUD, EUF, SS, NSS, and TST) with  $N > 50$ . Together with the 53 inducers, and the 33 DCN and 27 MIS lines, this yielded a core set of 363 lines (Table S2). Second, a PCA was performed with this core set as well as with inducers against all lines from each germplasm group of the 1482 noninducers. A three-dimensional plot for PCA of the core set and two-dimensional plots for the other PCAs were obtained by using R package *rgl* (Adler *et al.* 2014) and standard R software (R Development Core Team 2013), respectively. Third, we produced a neighbor-joining tree of the 53 inducers based on cluster analysis of Rogers' distance (Rogers 1972) estimates using R package *ape* (Paradis *et al.* 2004).

### Application of established GWAS methods for detecting individual SNPs or selective sweeps associated with HI

We analyzed our data with the following methods for detecting individual SNPs or selective sweeps associated with target traits. First, a genome-wide case-control association analysis (Wellcome Trust Case Control Consortium 2007), in which inducers were considered as cases and noninducers as con-

trols, was performed using software package Plink1.07 (Purcell *et al.* 2007). Second, we computed iHS and Rsb scores following Voight *et al.* (2006) and Tang *et al.* (2007), respectively, using R package *rehh* (Gautier and Vitalis 2012) to detect selective sweeps with long-range haplotypes (Sabeti *et al.* 2002) associated with HI. Third, we applied a population differentiation-based approach to detect selective sweeps associated with HI with the hapFLK score following Fariello *et al.* (2013) using their software package hapFLK. Finally, a composite likelihood method, the XP-CLR score (Chen *et al.* 2010), for detecting selective sweeps was applied using the XP-CLR package.

### A novel method for identifying selective sweeps under population structure–trait confounding

Since all methods described in the previous section failed in the analysis of our data, we developed a novel two-step approach for detecting selective sweeps underlying HI.

In the first step, a conditional haplotype extension procedure was applied to the group of cases (*i.e.*, inducers) for detecting all segments with both high frequency and long stretch. In a genome-wide scan, where markers are ordered according to their physical positions on the chromosome, each marker is analyzed one by one with the following procedure (see an illustration in Figure S6). Starting with marker  $m$ , we considered the genome segment spanning from marker  $m - l$  on the left side to marker  $m + r$  on the right side as a haplotype block. The values of  $l$  and  $r$  start at zero and are subsequently increased stepwise to the next integer, but independently in both directions. For each step of haplotype block extension, the frequency of the major haplotype within the block is determined in the cases. The maximum values of  $l$  and  $r$  for which the frequency of the major haplotype from  $m - l$  to  $m + r$  does not fall below a given threshold  $t$  are designated as  $l^*$  and  $r^*$ , respectively. The physical distance (in megabases) from marker  $m - l^*$  to marker  $m + r^*$  is referred to as CHE score, as an abbreviation for conditional haplotype extension in physical map units, and used as criterion for screening the entire genome. Various threshold  $t$  values can be chosen depending on the population under study. In our study, the objective was to detect the genomic segments required for HI among all maize inducers; therefore, we chose the very stringent threshold  $t = 1.0$ , which results in detection of long genomic segments fixed among all 53 inducers.

In the second step, a formal statistical test was carried out for the top  $n$  ( $n = 10$  in our study) segments with the highest CHE scores detected in the first step (details were described in File S3) as well as for the *qhir11* segment that was not among the 10 segments with the highest CHE score but for which prior knowledge existed from Dong *et al.* (2013). Briefly, we calculated for each genomic segment separately a Clopper–Pearson confidence interval (Clopper and Pearson 1934) for testing the hypothesis that transmission of the detected segment through known pedigrees of the cases cannot be explained by chance alone in the development of new inducers.

## Graphical genotype analysis

Based on the 1-LOD support intervals of QTL *qhir1* from four segregating populations (Prigge *et al.* 2012), we first determined a combined support interval for *qhir1* (*qhir1*-CSI) with the following steps: (i) search for the eight nearest markers outside the 1-LOD support intervals of *qhir1* from the four segregating populations, and (ii) determine the farthest left and farthest right markers among the eight markers. This revealed a genomic region spanning from position 46.21 to 96.55 Mb on chromosome 1 (Figure 3A) according to the maize B73 AGP\_v2 (Schnable *et al.* 2009).

Subsequently, we inferred the segment transmission from founders to progeny inducers on the basis of the pedigree provided by maize breeders (Figure S2) using the 50k SNP chip marker data. Briefly, the segment of Stock6.M741F in the *qhir1*-CSI was considered as source genome fragment in the entire region of *qhir1*-CSI, because it represents the original Stock6 (Lawrence *et al.* 2005). For the 52 remaining inducers, we determined the origin of their genomic fragments in the *qhir1*-CSI in two steps. First, we compared the marker profile of a specific inducer with that of all possible founders involved in its pedigree (Figure S2) to identify the map positions of former recombination sites. Thus, its genome in the *qhir1*-CSI was divided into several fragments on the basis of putative recombination sites. Second, for a specific fragment flanked by a pair of adjacent recombination sites, we determined its oldest founder among all founders having identical marker profile with this fragment.

To examine the reliability of graphical genotypes constructed with the 50k SNP chip, we also constructed graphical genotypes in the *qhir1*-CSI region for the 17 selected maize inducers (indicated in Table S1 and described in the section *Genotyping*) genotyped with the 600k SNP chip using the same procedure as described above.

## Evaluation of HI rate of two noninducers

As shown in the text (Figure 3D), based on the 186 SNP markers from the 600k SNP chip in the *qhir11* region, the minor haplotype allele present in two inducers was also found in two noninducers, Mo1W and Tx303. To test whether this haplotype allele alone confers HI in maize, Mo1W and Tx303, together with five inducers and five randomly chosen noninducers as controls (Table S3) were crossed to a liguleless (*lg2*) tester for evaluating their HI rate. After harvest, we randomly chose ~1000 kernels from each of the testcrosses and seeded them in the greenhouse to identify haploid plants in growth stage v3 (Abendroth *et al.* 2011) on the basis of the liguleless phenotype followed by flow cytometry analysis to confirm haploidy of the plants classified as liguleless.

## Resequencing data analysis

Inducer line CAU5 and noninducer line 1680 from China Agricultural University as well as noninducer lines Lo11, D06, F98902, B73, EP1, PH207, and Teosinte from the University of Hohenheim were sequenced by the Illumina HiSeq

2000 platform (NCBI BioProject PRJNA260788; Unterseer *et al.* 2014). Genome resequencing data of noninducer lines Mo17, CML103, Dan340, Huangzaosi, Chang7-2, and Zheng58 were obtained from Chia *et al.* (2012; NCBI Sequence Read Archive SRA051245) and Jiao *et al.* (2012; NCBI Sequence Read Archive SRA049859).

The complete resequencing analysis for the *qhir1*-CSI region was performed with software CLC Genomics Workbench 7.5.1 (CLC Bio, <http://www.clcbio.com>). If not mentioned specifically, the parameter setting was default. After import of the raw genome sequencing data, the reads were trimmed: minimum number of nucleotides of a read = 15. Trimmed reads were mapped to the B73 genome (RefGen\_v2; Schnable *et al.* 2009). The parameters for read mapping (one mapping per line) are length fraction of alignment = 0.8, auto-detect paired distances = no, and nonspecific match handling = ignore. A detailed mapping report was created for the *qhir1*-CSI region (Table S4). InDels and structural variants were detected for each mapping. We performed the Fixed Ploidy Variant Detection model of CLC Genomics Workbench on each mapping file to detect sequence variations. Splice site effects and amino acid changes were analyzed using genome annotation of B73 genome RefGen\_v2 (Zea\_mays.AGPv2.15.gtf.gz at [ftp://ftp.ensemblgenomes.org/pub/plants/release-15/gtf/zea\\_mays/](ftp://ftp.ensemblgenomes.org/pub/plants/release-15/gtf/zea_mays/)). A genotype was called if it was supported by at least 10 reads with at least 90% of the reads being consistent with the major allele (threshold for homozygous calls) and with <10% of the reads indicating gaps or missing calls. Genotype calls from each mapping file were combined and only biallelic SNPs with at least one inducer and at least one noninducer call were considered for further analyses. All analyses were performed within R (R Development Core Team 2013).

## Data availability

File S4 and File S5, contain information about SNP marker and genotypes analyzed in this study with the 50k SNP chip and the 600k SNP chip, respectively. Resequencing data of inducer line CAU5 and noninducer line 1680 has been submitted to NCBI (accession: SRP065659). File S6 contains literature cited in the supplemental files.

## Acknowledgments

The authors thank J. Eder, F. Qiu, M. Sachs, and M. Beckert for providing materials of maize inducers used for genotyping; H. Silva, M. Halilaj, and J. Böhm for help with the liguleless and flow cytometry analyses; and W. Molenaar and H. Zhao for comments on earlier versions of the manuscript. We thank two anonymous reviewers for very helpful suggestions for improving the content of this publication.

Author contributions: A.E.M. designed this project and supervised the research. H.H., T.A.S., and A.E.M. wrote the manuscript, and all co-authors were involved in editing the manuscript. H.H. and T.A.S. performed most of the data analyses and developed the CHE test. C.C.S. contributed to



production of the genotyping; S.C and J.L. produced the resequencing data; and R.P., S.U., and C.C.S. analyzed the resequencing data. J. Y. contributed genotypic data for some maize inbred lines. W.S., S.C, B.M.P., O.A.S., V.R., A.Z., S.K.N. and V.K. developed maize inducers.

## Literature Cited

- Abendroth, L. J., R. W. Elmore, M. J. Boyer, and S. K. Marlay, 2011 *Corn Growth and Development*, Iowa State University Extension, Ames, Iowa.
- Adler, D., O. Nenadic, and W. Zucchini, 2014 rgl: 3D visualization device system (OpenGL). R package version 0.93.1098. Available at: <http://CRAN.R-project.org/package=rgl>. Accessed: January 20, 2016.
- Barret, P., M. Brinkmann, and M. Beckert, 2008 A major locus expressed in the male gametophyte with incomplete penetrance is responsible for in situ gynogenesis in maize. *Theor. Appl. Genet.* 117: 581–594.
- Browning, S. R., and B. L. Browning, 2007 Rapid and accurate haplotype phasing and missing-data inference for whole-genome association studies by use of localized haplotype clustering. *Am. J. Hum. Genet.* 81: 1084–1097.
- Char, S. N., E. Unger-Wallace, B. Frame, S. a. Briggs, M. Main *et al.*, 2015 Heritable site-specific mutagenesis using TALENs in maize. *Plant Biotechnol. J.* 13: 1002–1010.
- Chen, H., N. Patterson, and D. Reich, 2010 Population differentiation as a test for selective sweeps. *Genome Res.* 20: 393–402.
- Chase, S. S., 1969 Monoploids and monoploid-derivatives of maize (*Zea mays* L.). *Bot. Rev.* 35: 117–167.
- Chia, J.-M., C. Song, P. J. Bradbury, D. Costich, N. de Leon *et al.*, 2012 Maize HapMap2 identifies extant variation from a genome in flux. *Nat. Genet.* 44: 803–807.
- Clark, R. M., T. N. Wagler, P. Quijada, and J. Doebley, 2006 A distant upstream enhancer at the maize domestication gene *tb1* has pleiotropic effects on plant and inflorescent architecture. *Nat. Genet.* 38: 594–597.
- Clopper, C., and E. S. Pearson, 1934 The use of confidence or fiducial limits illustrated in the case of the binomial. *Biometrika* 26: 404–413.
- Coe, E. H., 1959 A line of maize with high haploid frequency. *Am. Nat.* 93: 381–382.
- Cook, J. P., M. D. McMullen, J. B. Holland, F. Tian, P. Bradbury *et al.*, 2012 Genetic architecture of maize kernel composition in the nested association mapping and inbred association panels. *Plant Physiol.* 158: 824–834.
- Dong, X., X. Xu, J. Miao, L. Li, D. Zhang *et al.*, 2013 Fine mapping of *qhir1* influencing in vivo haploid induction in maize. *Theor. Appl. Genet.* 126: 1713–1720.
- Fariello, M. I., S. Boitard, H. Naya, M. SanCristobal, and B. Servin, 2013 Detecting signatures of selection through haplotype differentiation among hierarchically structured populations. *Genetics* 193: 929–941.
- Ganal, M. W., G. Durstewitz, A. Polley, A. Bérard, E. S. Buckler *et al.*, 2011 A large maize (*zea mays* L.) SNP genotyping array: development and germplasm genotyping, and genetic mapping to compare with the B73 reference genome. *PLoS One* 6: e28334.
- Garbe, J. R., and D. Yang, 2008 *Pedigree: A Software Tool for the Graphing and Analysis of Large Complex Pedigree. User Manual Version 2.4*, Department of Animal Science, University of Minnesota Saint Paul, Minnesota.
- Gautier, M., and R. Vitalis, 2012 rehh: an R package to detect footprints of selection in genome-wide SNP data from haplotype structure. *Bioinformatics* 28: 1176–1177.
- Hanson, M. A., B. S. Gaut, A. O. Stec, S. I. Fuerstenberg, M. M. Goodman *et al.*, 1996 Evolution of anthocyanin biosynthesis in maize kernels: the role of regulatory and enzymatic loci. *Genetics* 143: 1395–1407.
- Jiao, Y., H. Zhao, L. Ren, W. Song, B. Zeng *et al.*, 2012 Genome-wide genetic changes during modern breeding of maize. *Nat. Genet.* 44: 812–815.
- Lai, J., R. Li, X. Xu, W. Jin, M. Xu *et al.*, 2010 Genome-wide patterns of genetic variation among elite maize inbred lines. *Nat. Genet.* 42: 1027–1030.
- Laird, N., P. Kraft, C. Lange, and K. V. Stehens, 2005 Testing for association in genetic studies, pp. 27–46 in *Respiratory Genetics*, edited by E. Silverman, S. Weiss, S. Shapiro, and D. Lomas. CRC Press, Boca Raton, FL.
- Lawrence, C. J., T. E. Seigfried, and V. Brendel, 2005 The maize genetics and genomics database. The community resource for access to diverse maize data. *Plant Physiol.* 138: 55–58.
- Li, L., X. Xu, W. Jin, and S. Chen, 2009 Morphological and molecular evidences for DNA introgression in haploid induction via a high oil inducer CAUHOI in maize. *Planta* 230: 367–376.
- Liu, K., and S. V. Muse, 2005 PowerMarker: an integrated analysis environment for genetic marker analysis. *Bioinformatics* 21: 2128–2129.
- Melchinger, A. E., W. Schipprack, T. Würschum, S. Chen, and F. Technow, 2013 Rapid and accurate identification of in vivo-induced haploid seeds based on oil content in maize. *Scientific reports. Nature* 3: 1–5.
- Melchinger, A. E., P. C. Brauner, J. Böhm, and W. Schipprack, 2016 *In vivo* haploid induction in maize: comparison of different testing regimes for measuring haploid induction rates. *Crop Sci* (in press).
- Mitchell, A., H.-Y. Chang, L. Daugherty, M. Fraser, S. Hunter *et al.*, 2014 The InterPro protein families database: the classification resource after 15 years. *Nucleic Acids Res.* 43: D213–D221.
- Paradis, E., J. Claude, and K. Strimmer, 2004 APE: analyses of phylogenetics and evolution in R language. *Bioinformatics* 20: 289–290.
- Prigge, V., X. Xu, L. Li, R. Babu, S. Chen *et al.*, 2012 New insights into the genetics of in vivo induction of maternal haploids, the backbone of doubled. *Genetics* 190: 781–793.
- Purcell, S., B. Neale, K. Todd-Brown, L. Thomas, M. A. Ferreira *et al.*, 2007 PLINK: a tool set for whole-genome association and population-based linkage analyses. *Am. J. Hum. Genet.* 81: 559–575.
- Qiu, F., Y. Liang, Y. Li, Y. Liu, L. Wang *et al.*, 2014 Morphological, cellular and molecular evidences of chromosome random elimination in vivo upon haploid induction in maize. *Curr. Plant Biol.* 1: 83–90.
- R Development Core Team, 2013 R: A language and environment for statistical computing. R Foundation for Statistical Computing. Vienna. Available at: <http://www.R-project.org>. Accessed: March 07, 2016.
- Röber, F., 1999 Fortpflanzungsbiologische und genetische Untersuchungen mit RFLPMarkern zur in-vivo-Haploideninduktion bei Mais. Ph.D. Thesis. Universität Hohenheim, Stuttgart, Germany.
- Rogers, J. S., 1972 Measures of similarity and genetic distance, pp. 145–153 in *Studies in Genetics VII*. University of Texas Publication, Austin, Texas.
- Sabeti, P. C., D. E. Reich, J. M. Higgins, H. Z. P. Levine, D. J. Richter *et al.*, 2002 Detecting recent positive selection in the human genome from haplotype structure. *Nature* 419: 832–837.
- Salvi, S., G. Sponza, M. Morgante, D. Tomes, X. Niu *et al.*, 2007 Conserved noncoding genomic sequences associated with a flowering-time quantitative trait locus in maize. *Proc. Natl. Acad. Sci. USA* 104: 11376–11381.

- Sarkar, K., and E. H. Coe, 1966 A genetic analysis of the origin of maternal haploids in maize. *Genetics* 54: 453–464.
- Schnable, P. S., D. Ware, R. S. Fulton, J. C. Stein, F. Wei *et al.*, 2009 The B73 maize genome: complexity, diversity, and dynamics. *Science* 326: 1112–1115.
- Svitashev, S., J. Young, C. Schwartz, H. Gao, S. C. Falco *et al.*, 2015 Targeted mutagenesis, precise gene editing and site-specific gene insertion in maize using Cas9 and guide RNA. *Plant Physiol.* 169: 931–945.
- Tang, K., K. R. Thornton, and M. Stoneking, 2007 A new approach for using genome scans to detect recent positive selection in the human genome. *PLoS Biol.* 5: 1587–1602.
- UniProt Consortium, 2014 UniProt: a hub for protein information. *Nucleic Acids Res.* 43: D204–D212.
- Unterseer, S., E. Bauer, G. Haberer, M. Seidel, C. Knaak *et al.*, 2014 A powerful tool for genome analysis in maize: development and evaluation of the high density 600 k SNP genotyping array. *BMC Genomics* 15: 823.
- Vitti, J. J., S. R. Grossman, and P. C. Sabeti, 2013 Detecting natural selection in genomic data. *Annu. Rev. Genet.* 47: 97–120.
- Voight, B. F., S. Kudravalli, X. Wen, and J. K. Pritchard, 2006 A map of recent positive selection in the human genome. *PLoS Biol.* 4: 0446–0458.
- Wellcome Trust Case Control Consortium, 2007 Genome-wide association study of 14,000 cases of seven common diseases and 3,000 shared controls. *Nature* 447: 661–678.
- Xu, X., L. Li, X. Dong, W. Jin, A. E. Melchinger *et al.*, 2013 Gametophytic and zygotic selection leads to segregation distortion through in vivo induction of a maternal haploid in maize. *J. Exp. Bot.* 64: 1083–1096.
- Yang, X., S. Gao, S. Xu, Z. Zhang, B. M. Prasanna *et al.*, 2011 Characterization of a global germplasm collection and its potential utilization for analysis of complex quantitative traits in maize. *Mol. Breed.* 28: 511–526.
- Zuo, W., Q. Chao, N. Zhang, J. Ye, G. Tan *et al.*, 2015 A maize wall-associated kinase confers quantitative resistance to head smut. *Nat. Genet.* 47: 151–157.

*Communicating editor: A. H. Paterson*

# GENETICS

Supporting Information

[www.genetics.org/lookup/suppl/doi:10.1534/genetics.115.184234/-/DC1](http://www.genetics.org/lookup/suppl/doi:10.1534/genetics.115.184234/-/DC1)

## The Genetic Basis of Haploid Induction in Maize Identified with a Novel Genome-Wide Association Method

Haixiao Hu, Tobias A. Schrag, Regina Peis, Sandra Unterseer, Wolfgang Schipprack, Shaojiang Chen, Jinsheng Lai, Jianbing Yan, Boddupalli M. Prasanna, Sudha K. Nair, Vijay Chaikam, Valeriu Rotarencu, Olga A. Shatskaya, Alexandra Zavalishina, Stefan Scholten, Chris-Carolin Schön and Albrecht E. Melchinger

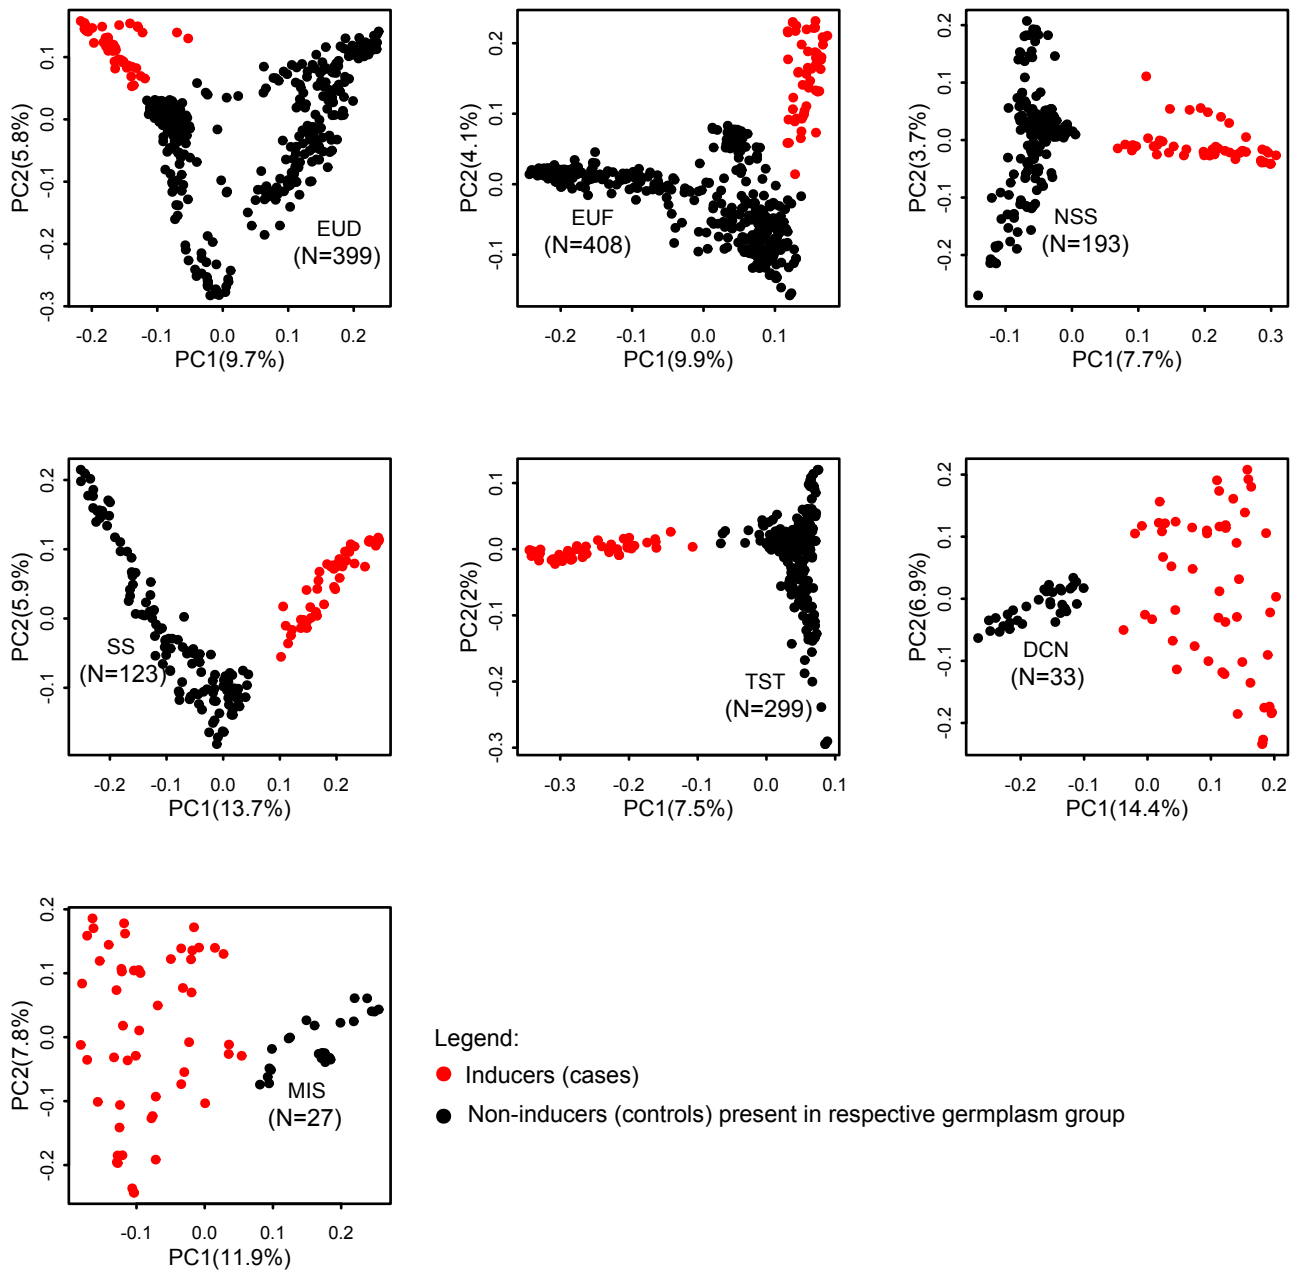

**Figure S1** Genetic structure revealed by the first two principal components (PC) obtained from PCA with 29,533 SNP for 53 inducers against all lines from the respective germplasm group of 1,482 non-inducers analyzed in this study.

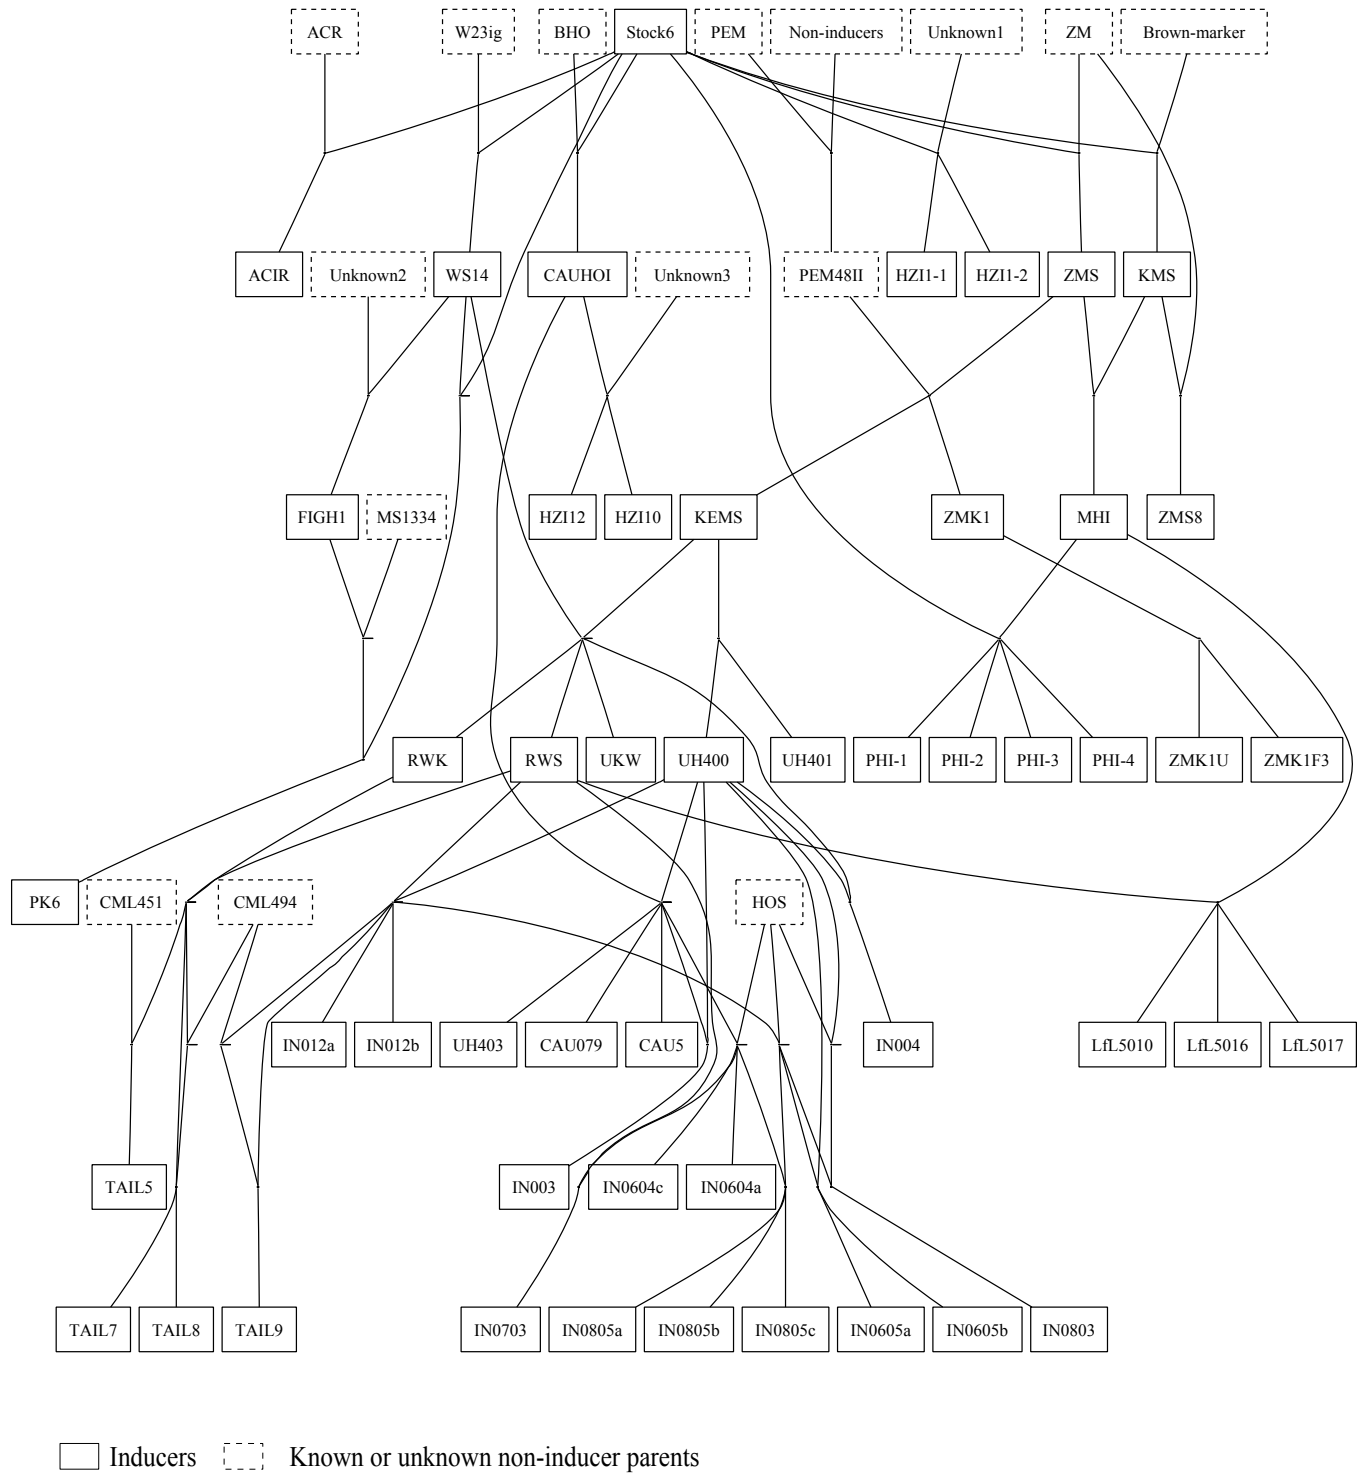

**Figure S2** Pedigree of the worldwide collection of maize haploid inducers analyzed in this study.

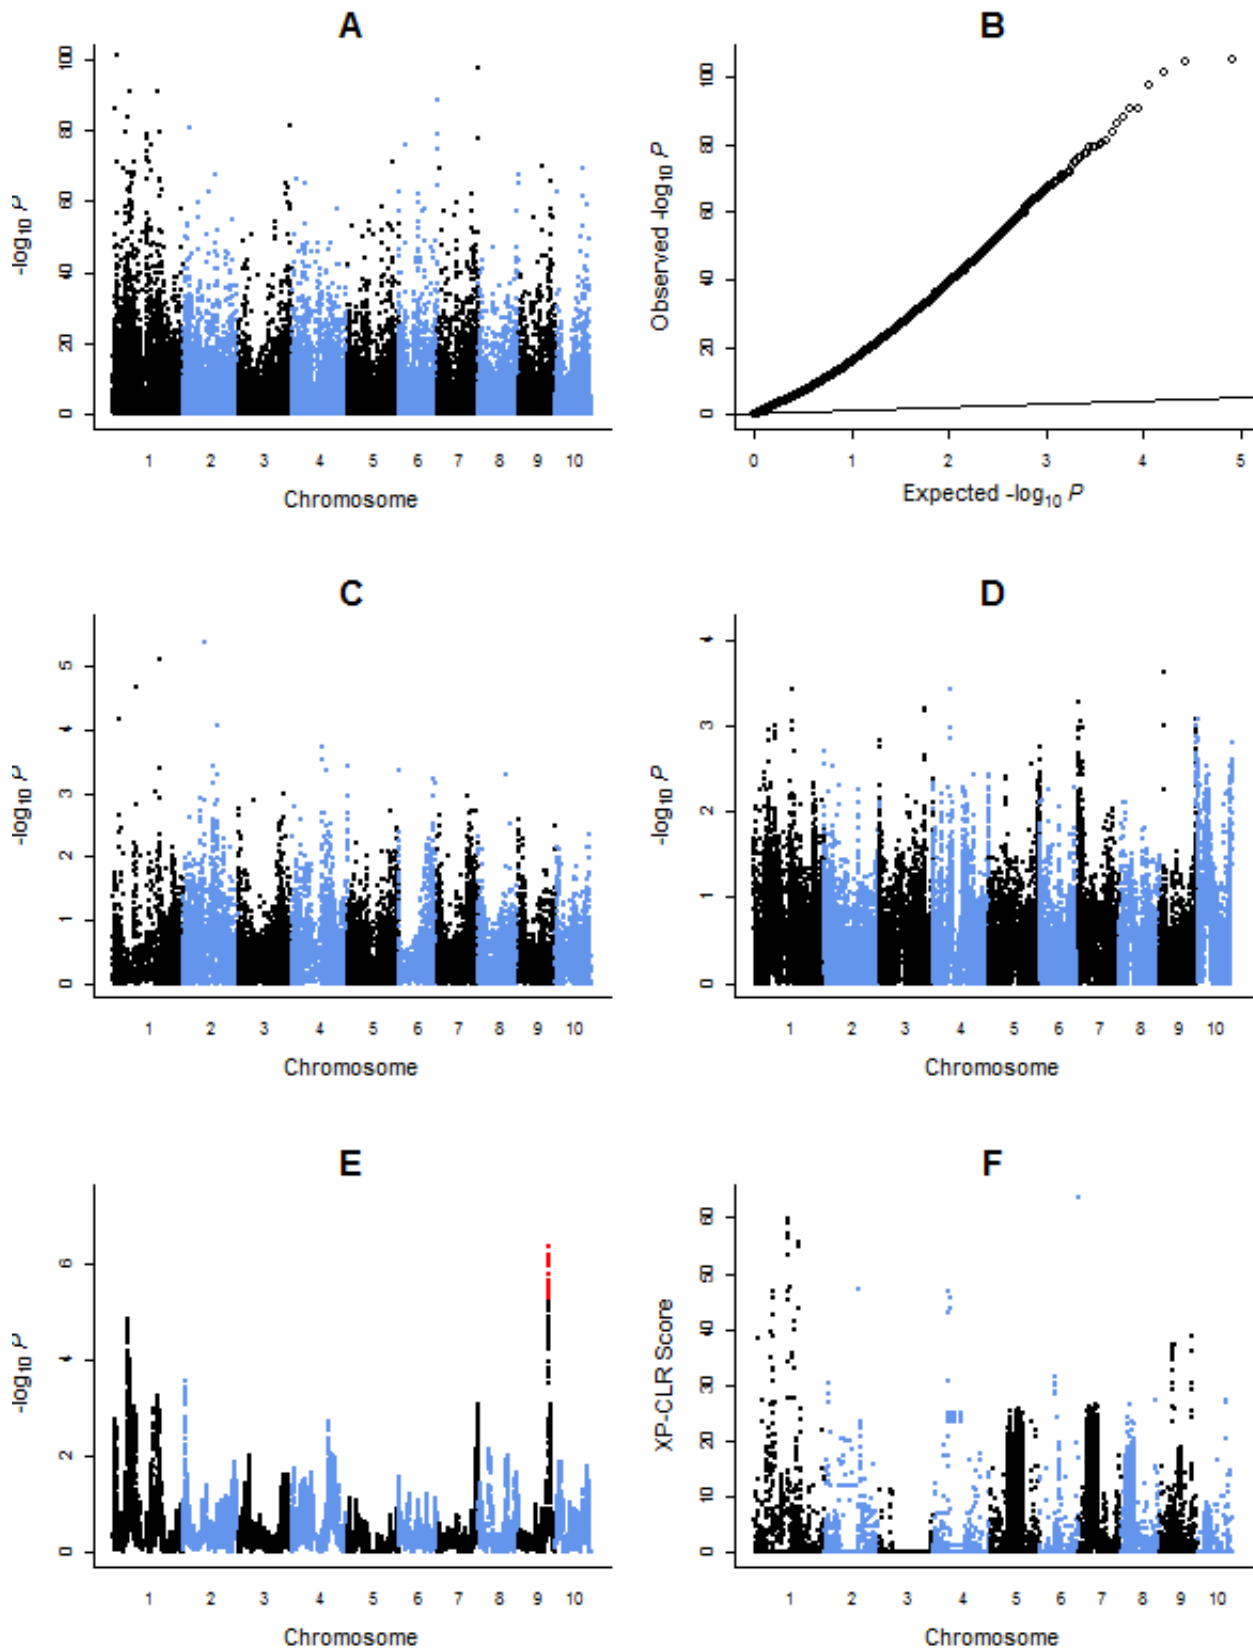

**Figure S3** Genome-wide scans for molecular markers or selective sweeps associated with *in vivo* haploid induction (HI). Case-control association analysis: (A) Manhattan plot, (B) Q-Q plot. Manhattan plot for selective sweeps with the (C) iHS score, (D) Rsb score, (E) hapFLK score and (F) XP-CLR score. For (A), (C), (D) and (E), P values are shown on a log<sub>10</sub> scale. P values were colored in red in (C), (D) and (E) if significant with FDR < 0.01.

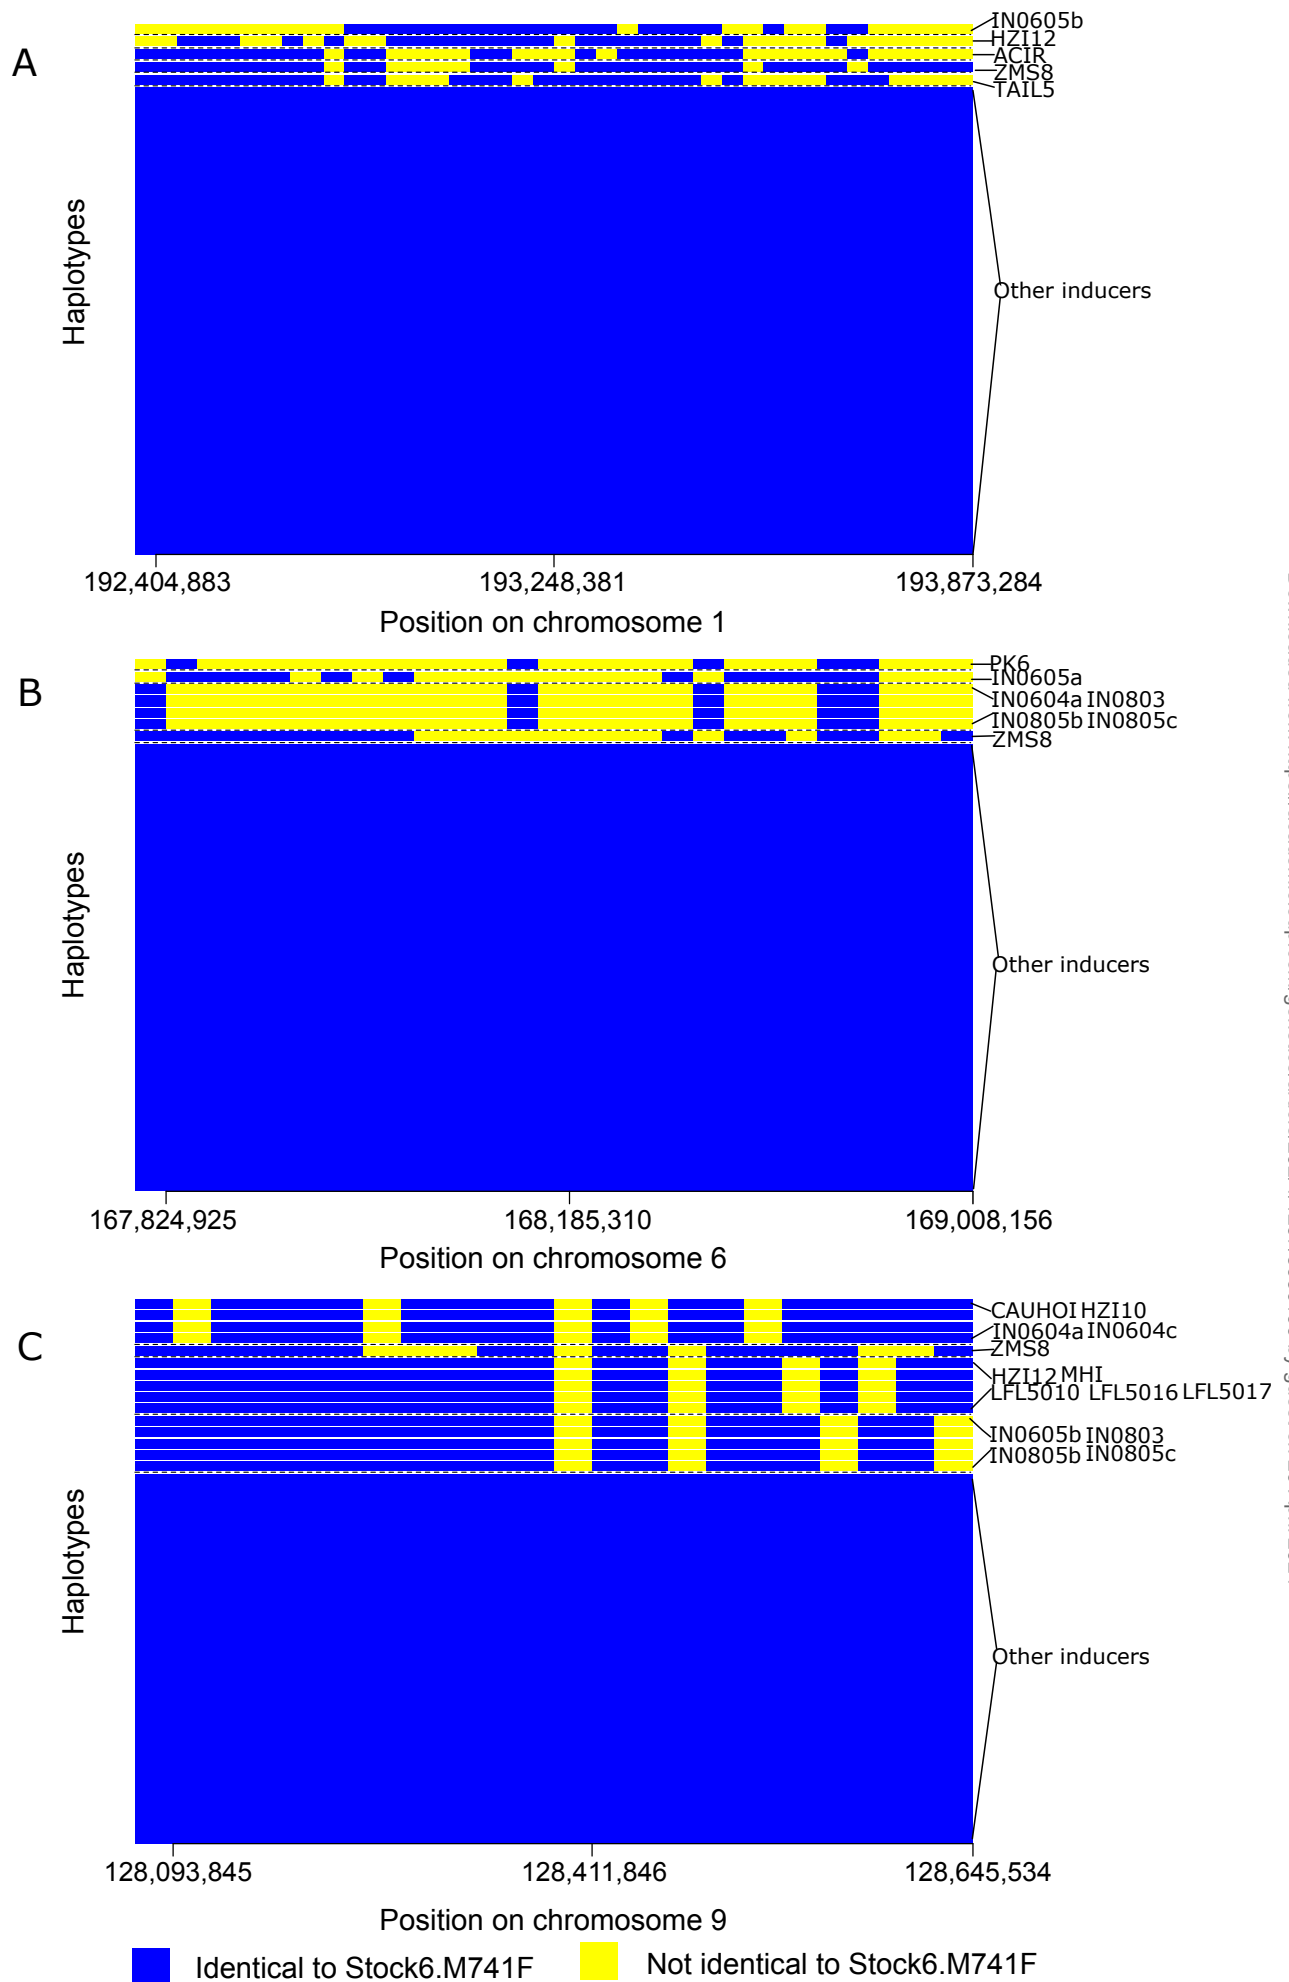

**Figure S4** Haplotypes of inducers in genomic regions with XP-CLR scores > 50 in (A) and (B) and with significant hapFLK scores in (C).

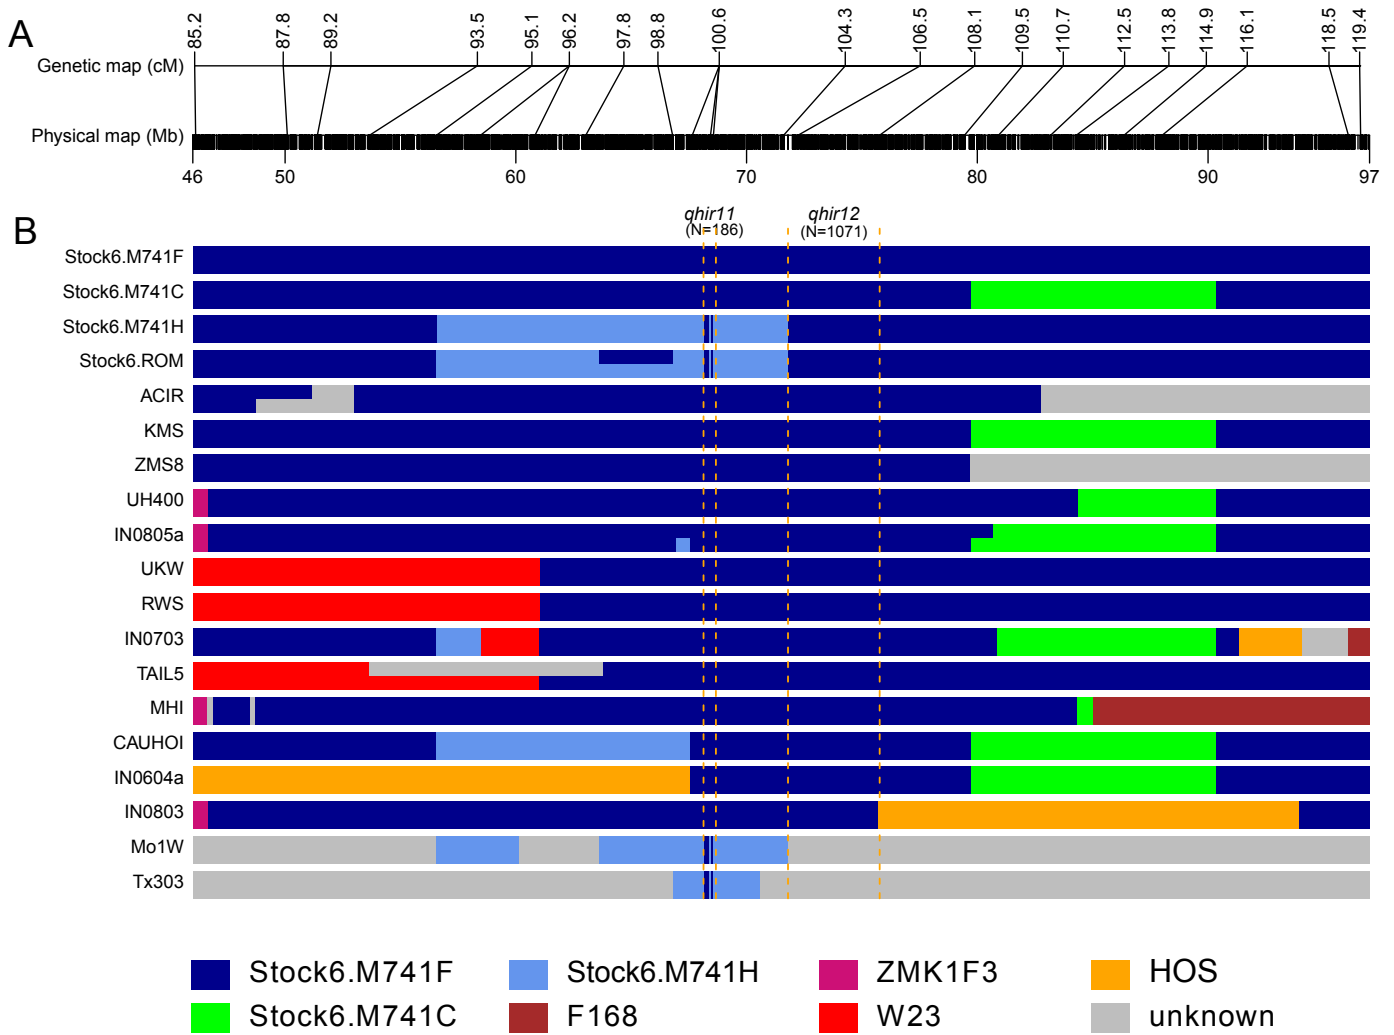

**Figure S5** Graphical genotypes of 17 maize haploid inducers and non-inducers of Mo1W and Tx303 in the combined support interval of QTL *qhir1* (*qhir1*-CSI) based on marker data of the 600k chip. (A) Physical and genetic maps. (B) Graphical genotypes indicating the origin of genomic fragments of inducers from their founders.



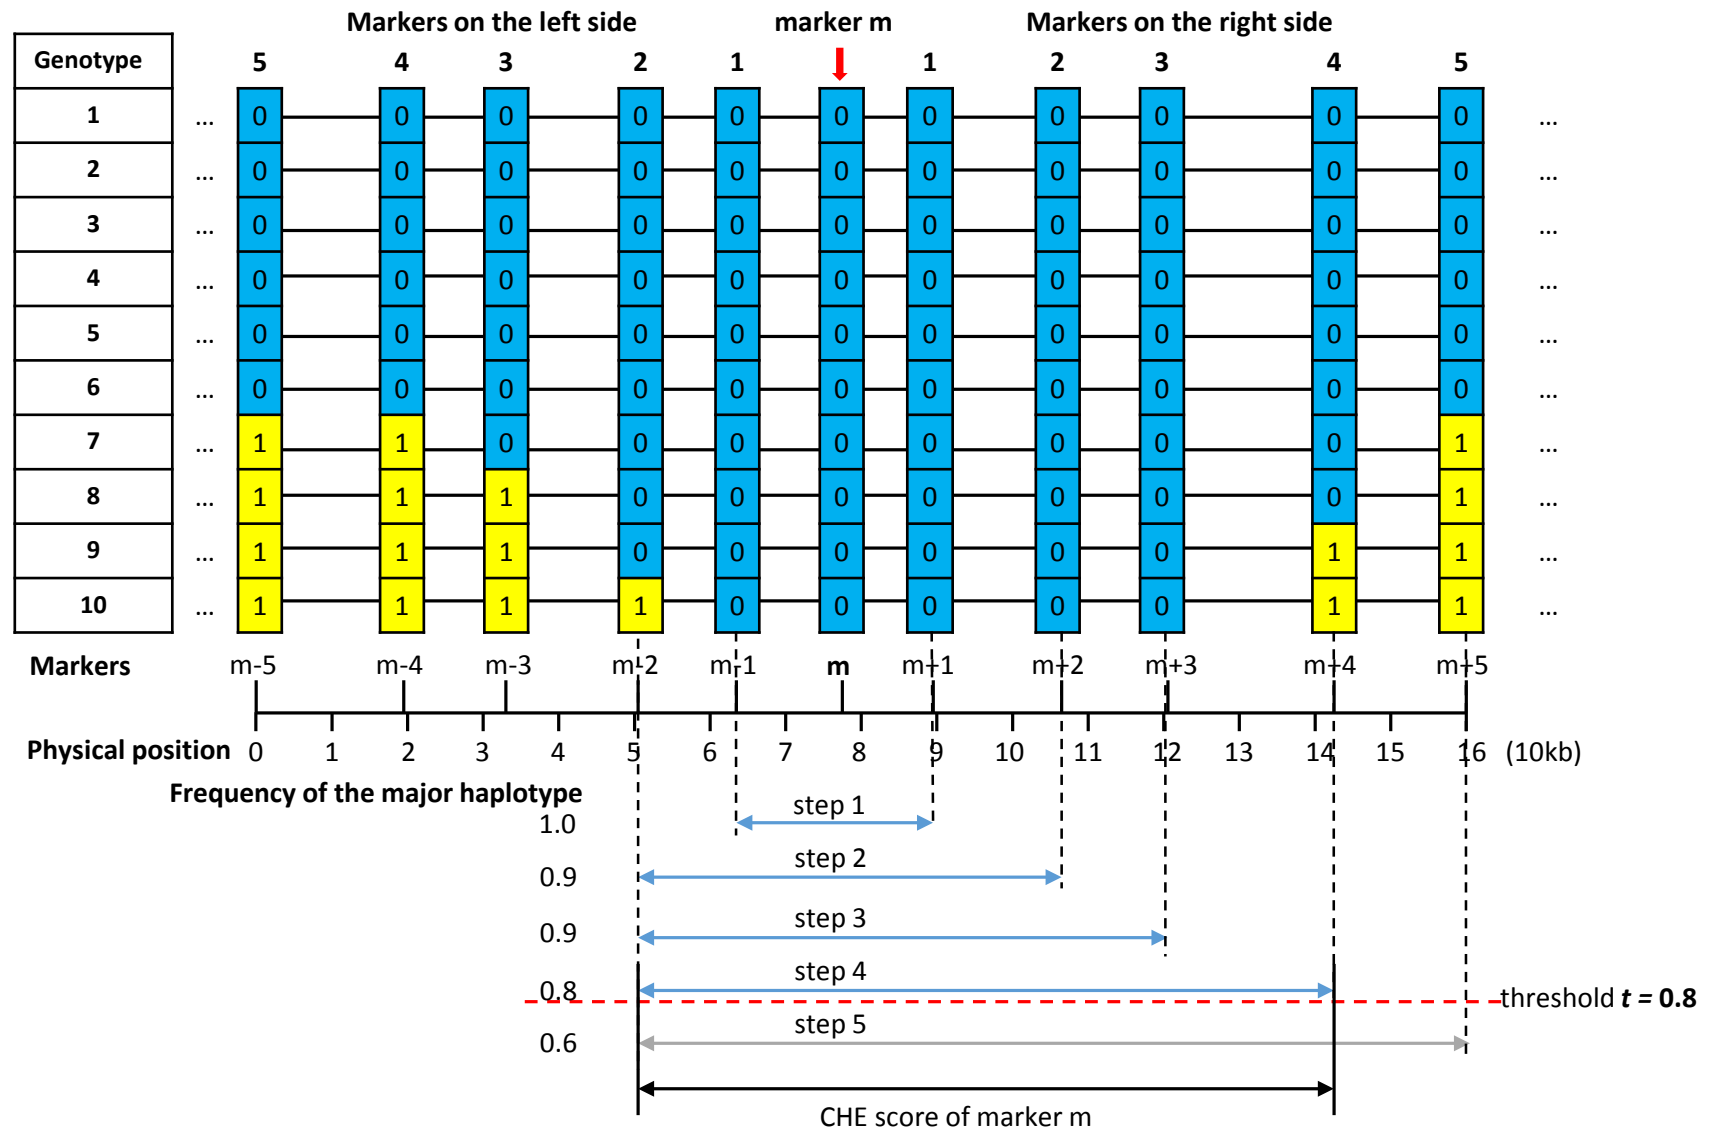

**Figure S6** Illustration of the conditional haplotype extension (CHE) method.

**Table S1** Information about the 53 inducers analyzed in this study.

| Name <sup>a</sup> | Country | Source <sup>b</sup> | Pedigree <sup>c</sup>      | Type <sup>d</sup> | CR <sup>e</sup> | HET <sup>f</sup> | HIR <sup>g</sup> | Reference <sup>h</sup> |
|-------------------|---------|---------------------|----------------------------|-------------------|-----------------|------------------|------------------|------------------------|
| Stock6.M741B      | US      | MGCSC               | Unknown                    | –                 | 0.997           | 0.002            | 2.3              | Coe                    |
| Stock6.M741C*     | US      | MGCSC               | Unknown                    | –                 | 0.995           | 0.000            | 2.3              | Coe                    |
| Stock6.M741F*     | US      | MGCSC               | Unknown                    | –                 | 0.992           | 0.003            | 2.3              | Coe                    |
| Stock6.M741H*     | US      | MGCSC               | Unknown                    | –                 | 0.991           | 0.025            | 2.3              | Coe ; Eder & Chalyk    |
| Stock6.M741I      | US      | MGCSC               | Unknown                    | –                 | 0.993           | 0.000            | 2.3              | Coe                    |
| Stock6.HOH        | US      | UHOH                | Unknown                    | –                 | 0.992           | 0.008            | 2.3              | Coe                    |
| Stock6.INRA       | US      | INRA                | Unknown                    | –                 | 0.994           | 0.001            | 2.3              | Coe                    |
| Stock6.ROM*       | US      | USAMV               | Unknown                    | –                 | 0.995           | 0.007            | 2.3              | Coe                    |
| ACIR*             | IN      | IARI                | (Stock6×ACR)×Stock6        | 3                 | 0.986           | 0.007            | 3                | Sarkar                 |
| CAU079            | CN      | CAU                 | CAUHOI×UH400               | 5                 | 0.992           | 0.001            | 6                | Xu et al.              |
| CAU5              | CN      | CAU                 | CAUHOI×UH400               | 5                 | 0.991           | 0.003            | 8                | Xu et al.              |
| CAUHOI*           | CN      | CAU                 | BHO×Stock6                 | 4                 | 0.988           | 0.001            | 3                | Prigge et al.          |
| HZI1.1            | CN      | HZAU                | Synthetic including Stock6 | 4                 | 0.992           | 0.005            | 6-8              | FQ                     |
| HZI1.2            | CN      | HZAU                | Synthetic including Stock6 | 4                 | 0.990           | 0.008            | 4-6              | FQ                     |
| HZI10             | CN      | HZAU                | Synthetic including CAUHOI | 4                 | 0.986           | 0.021            | 6-8              | FQ                     |
| HZI12             | CN      | HZAU                | Synthetic including CAUHOI | 4                 | 0.982           | 0.030            | 5-6              | FQ                     |
| IN003             | DE      | UHOH                | (UH400×CAUHOI)×UH400       | 5                 | 0.994           | 0.001            | 9                | WS                     |
| IN004             | DE      | UHOH                | UH400×UKW                  | 5                 | 0.993           | 0.002            | 9                | WS                     |
| IN012a            | DE      | UHOH                | UH400×RWS                  | 5                 | 0.992           | 0.014            | 10               | WS                     |
| IN012b            | DE      | UHOH                | UH400×RWS                  | 5                 | 0.987           | 0.011            | 11               | WS                     |
| IN0604a*          | DE      | UHOH                | (UH400×CAUHOI)×HOS         | 1                 | 0.986           | 0.002            | 10               | WS                     |
| IN0604c           | DE      | UHOH                | (UH400×CAUHOI)×HOS         | 1                 | 0.951           | 0.006            | 3                | WS                     |

| Name <sup>a</sup> | Country | Source <sup>b</sup> | Pedigree <sup>c</sup>                       | Type <sup>d</sup> | CR <sup>e</sup> | HET <sup>f</sup> | HIR <sup>g</sup> | Reference <sup>h</sup> |
|-------------------|---------|---------------------|---------------------------------------------|-------------------|-----------------|------------------|------------------|------------------------|
| IN0605a           | DE      | UHOH                | ((UH400×RWS)×HOS)×UH400                     | 3                 | 0.981           | 0.001            | 6                | WS                     |
| IN0605b           | DE      | UHOH                | ((UH400×RWS)×HOS)×UH400                     | 3                 | 0.986           | 0.001            | 8                | WS                     |
| IN0703*           | DE      | UHOH                | ((UH400×CAUHOD)×HOS)×RWS                    | 3                 | 0.993           | 0.002            | 11               | WS                     |
| IN0803*           | DE      | UHOH                | ((UH400×RWS)×HOS)×(UH400×HOS)               | 2                 | 0.985           | 0.006            | 5                | WS                     |
| IN0805a*          | DE      | UHOH                | ((UH400×CAUHOD)×HOS)×((UH400×RWS)×HOS)      | 2                 | 0.981           | 0.008            | 4                | WS                     |
| IN0805b           | DE      | UHOH                | ((UH400×CAUHOD)×HOS)×((UH400×RWS)×HOS)      | 2                 | 0.972           | 0.011            | 3                | WS                     |
| IN0805c           | DE      | UHOH                | ((UH400×CAUHOD)×HOS)×((UH400×RWS)×HOS)      | 2                 | 0.892           | 0.015            | 3                | WS                     |
| LfL5010           | DE      | LfL                 | MHI×RWS                                     | 5                 | 0.995           | 0.005            | 17               | JE                     |
| LfL5016           | DE      | LfL                 | MHI×RWS                                     | 5                 | 0.997           | 0.001            | 10               | JE                     |
| LfL5017           | DE      | LfL                 | MHI×RWS                                     | 5                 | 0.997           | 0.004            | 17               | JE                     |
| MHI*              | MD      | IG                  | KMS×ZMS                                     | 5                 | 0.910           | 0.005            | 7-9              | Chalyk                 |
| PHI.1             | RO      | USAMV               | MHI×Stock6                                  | 5                 | 0.989           | 0.029            | 11-12            | Rotarenco et al.       |
| PHI.2             | RO      | USAMV               | MHI×Stock6                                  | 5                 | 0.986           | 0.020            | 12-15            | Rotarenco et al.       |
| PHI.3             | RO      | USAMV               | MHI×Stock6                                  | 5                 | 0.983           | 0.019            | 14-15            | Rotarenco et al.       |
| PHI.4             | RO      | USAMV               | MHI×Stock6                                  | 5                 | 0.995           | 0.000            | 10-16            | Rotarenco et al.       |
| PK6               | FR      | INRA                | Synthetic of Stock6, WS14, FIGH1 and MS1334 | 4                 | 0.991           | 0.001            | 6                | Barret et al.          |
| RWK               | DE      | UHOH                | KEMS×WS14                                   | 5                 | 0.996           | 0.000            | 9-10             | Geiger                 |
| RWS*              | DE      | UHOH                | KEMS×WS14                                   | 5                 | 0.998           | 0.000            | 8                | Röber et al.           |
| TAIL5*            | MX      | CIMMYT              | (CML451×(RWS×RWK))×(RWS×RWK)                | 3                 | 0.990           | 0.018            | 5                | Prigge et al.          |
| TAIL7             | MX      | CIMMYT              | (CML494×(RWS×RWK))×(RWS×RWK)                | 3                 | 0.992           | 0.003            | 11               | Prigge et al.          |
| TAIL8             | MX      | CIMMYT              | (CML494×(RWS×RWK))×(RWS×RWK)                | 3                 | 0.988           | 0.022            | 11               | Prigge et al.          |
| TAIL9             | MX      | CIMMYT              | (CML494×(RWS×UH400))×(RWS×UH400)            | 3                 | 0.978           | 0.028            | 10               | Prigge et al.          |
| UH400*            | DE      | UHOH                | KEMS                                        | 4                 | 0.998           | 0.000            | 8                | Prigge et al.          |
| UH401             | DE      | UHOH                | KEMS                                        | 4                 | 0.985           | 0.000            | 8                | WS                     |

| Name <sup>a</sup> | Country | Source <sup>b</sup> | Pedigree <sup>c</sup>                         | Type <sup>d</sup> | CR <sup>e</sup> | HET <sup>f</sup> | HIR <sup>g</sup> | Reference <sup>h</sup> |
|-------------------|---------|---------------------|-----------------------------------------------|-------------------|-----------------|------------------|------------------|------------------------|
| UH403             | DE      | UHOH                | UH400×CAUHOI                                  | 5                 | 0.994           | 0.014            | 9                | WS                     |
| UKW*              | DE      | UHOH                | KEMS×WS14                                     | 5                 | 0.976           | 0.006            | 11               | WS                     |
| WS14              | FR      | INRA                | Stock6×W23ig                                  | 1                 | 0.991           | 0.002            | 3-5              | Lashermes & Beckert    |
| ZMK1F3            | RU      | KLARI               | Zarodishevy marker krasnodar (ZMK1) synthetic | 4                 | 0.963           | 0.039            | 5-8              | Shatskaya              |
| ZMK1U             | RU      | KLARI               | ZMK1 synthetic                                | 4                 | 0.953           | 0.082            | 3-10             | Zabirova et al.        |
| KMS*              | RU      | SSU                 | Brown Marker × Stock6                         | 1                 | 0.964           | 0.009            | 2-4              | AZ                     |
| ZMS8*             | RU      | SSU                 | ZM × KMS                                      | 1                 | 0.758           | 0.040            | 8-10             | Zavalishina et al.     |

<sup>a</sup>Name: \*indicates lines genotyped with the 600k chip

<sup>b</sup>Source:

CAU = China Agricultural University, Beijing, China

CIMMYT = International Maize and Wheat Improvement Center, Mexico

HZAU = Huazhong Agricultural University, Wuhan, China

IARI = Indian Agricultural Research Institute, India

IG = Institute of Genetics, Kishinev, Moldova

INRA = The National Institute for Agricultural Research, France

KLARI = Krasnodar Lukyanenko Agricultural Research Institute, Russia

LfL = Bayerische Landesanstalt für Landwirtschaft, Freising, Germany

MGCSC = Maize Genetics Cooperation Stock Center, Illinois, United States of America

SSU = Saratov State University, Russia

UHOH = University of Hohenheim, Stuttgart, Germany

USAMV = University of Agronomic Science and Veterinary Medicine, Bucharest, Romania

<sup>c</sup>Pedigree:

BHO = Beijing High Oil Synthetic

HOS = Hohenheim High Oil Synthetic

KEMS = Krasnodar Embryo Marker Synthetic

<sup>d</sup>Type of source population:

1 = N×I, in which I=inducer and N=non-inducer

2 = (I×N)×(I×N)

3 = (I×N)×I

4 = Synthetic

5 = I×I

<sup>e</sup>Call rate

<sup>f</sup>Heterozygosity

<sup>g</sup>Haploid induction rate according to literature or personal communication

<sup>h</sup>Reference:

FQ = F. Qiu, personal communication 2013

JE = J. Eder, personal communication 2013

WS = W. Schipprack, personal communication 2013

AZ = Alexandra Zavalishina, personal communication 2014

**Table S2** Information about the 310 non-inducer lines included in the core set analyzed in this study.

| Line name      | Heterotic group | Source <sup>a</sup> | Reference <sup>b</sup> |
|----------------|-----------------|---------------------|------------------------|
| A188           | NSS             | Cook et al.         | Gerdes et al.          |
| A554           | SS              | Cook et al.         | BT                     |
| A619           | NSS             | Yang et al.         | MBS Inc.               |
| A654           | SS              | Cook et al.         | MB                     |
| Ab28A          | SS              | Cook et al.         | MB                     |
| B10            | SS              | Cook et al.         | Gerdes et al.          |
| B103           | NSS             | Cook et al.         | Romay et al.           |
| B104           | SS              | UHOH                | Romay et al.           |
| B107           | EUD             | UHOH                | TAS                    |
| B114           | NSS             | Yang et al.         | Gerdes et al.          |
| B164           | SS              | Cook et al.         | Romay et al.           |
| B2             | NSS             | Cook et al.         | MB                     |
| B47            | SS              | Ganal et al.        | Romay et al.           |
| B52            | NSS             | Cook et al.         | Nelson                 |
| B73Htrhm       | EUD             | Cook et al.         | TAS                    |
| BUGA.084       | EUf             | UHOH                | TAS                    |
| By809          | NSS             | Yang et al.         | SC                     |
| By843          | NSS             | Yang et al.         | SC                     |
| C8605          | SS              | Yang et al.         | SZ                     |
| Carg_2369      | SS              | UHOH                | TAS                    |
| CH27_17        | EUf             | UHOH                | TAS                    |
| CH28_2         | EUf             | UHOH                | TAS                    |
| Chang3         | DCN             | Yang et al.         | SZ                     |
| Chang7.2       | DCN             | Yang et al.         | SZ                     |
| chuan48.2      | DCN             | Yang et al.         | SZ                     |
| CI31A          | NSS             | Cook et al.         | MB                     |
| CI7            | NSS             | Yang et al.         | Gerdes et al.          |
| CIMBL1         | TST             | Yang et al.         | Yang et al.            |
| CIMBL100       | TST             | Yang et al.         | Yang et al.            |
| CIMBL106       | TST             | Yang et al.         | Yang et al.            |
| CIMBL108       | TST             | Yang et al.         | Yang et al.            |
| CIMBL11        | TST             | Yang et al.         | Yang et al.            |
| CIMBL117       | TST             | Yang et al.         | Yang et al.            |
| CIMBL122       | TST             | Yang et al.         | Yang et al.            |
| CIMBL123       | TST             | Yang et al.         | Yang et al.            |
| CIMBL157       | TST             | Yang et al.         | Yang et al.            |
| CIMBL18        | TST             | Yang et al.         | Yang et al.            |
| CIMBL24        | TST             | Yang et al.         | Yang et al.            |
| CIMBL29        | TST             | Yang et al.         | Yang et al.            |
| CIMBL38        | TST             | Yang et al.         | Yang et al.            |
| CIMBL48        | TST             | Yang et al.         | Yang et al.            |
| CIMBL63        | TST             | Yang et al.         | Yang et al.            |
| CIMBL70        | TST             | Yang et al.         | Yang et al.            |
| CIMBL81        | TST             | Yang et al.         | Yang et al.            |
| CIMBL89        | TST             | Yang et al.         | Yang et al.            |
| CIMBL90        | TST             | Yang et al.         | Yang et al.            |
| CM.GER.MPS1.P2 | TST             | UHOH                | TAS                    |

| Line name       | Heterotic group | Source <sup>a</sup> | Reference <sup>b</sup> |
|-----------------|-----------------|---------------------|------------------------|
| CM.GER.MPS1.P24 | TST             | UHOH                | TAS                    |
| CM.GER.MPS1.P25 | TST             | UHOH                | TAS                    |
| CM.GER.MPS1.P29 | TST             | UHOH                | TAS                    |
| CM.GER.MPS1.P30 | TST             | UHOH                | TAS                    |
| CM.GER.MPS1.P31 | TST             | UHOH                | TAS                    |
| CM174           | SS              | Cook et al.         | MBS Inc.               |
| CML103          | TST             | Cook et al.         | Flint-Garcia et al.    |
| CML139          | TST             | Yang et al.         | Yang et al.            |
| CML154Q         | TST             | Cook et al.         | Flint-Garcia et al.    |
| CML162          | TST             | Yang et al.         | Yang et al.            |
| CML220          | TST             | Cook et al.         | Flint-Garcia et al.    |
| CML258          | TST             | Cook et al.         | Flint-Garcia et al.    |
| CML261          | TST             | Cook et al.         | Flint-Garcia et al.    |
| CML264          | TST             | Cook et al.         | Flint-Garcia et al.    |
| CML314          | TST             | Cook et al.         | TAS                    |
| CML32           | TST             | Yang et al.         | Yang et al.            |
| CML361          | TST             | Yang et al.         | Yang et al.            |
| CML431          | TST             | Yang et al.         | Yang et al.            |
| CML451          | TST             | Yang et al.         | Yang et al.            |
| CML471          | TST             | Yang et al.         | Yang et al.            |
| CML494          | TST             | UHOH                | TAS                    |
| CMIL69          | TST             | Ganal et al.        | Ganal et al.           |
| CORU.002        | EUf             | UHOH                | TAS                    |
| CZL0618         | TST             | UHOH                | TAS                    |
| D01             | EUD             | UHOH                | TAS                    |
| D06             | EUD             | UHOH                | TAS                    |
| D102            | EUf             | UHOH                | TAS                    |
| D118            | EUf             | UHOH                | TAS                    |
| D147            | EUf             | UHOH                | TAS                    |
| D199            | EUf             | UHOH                | TAS                    |
| D21             | EUD             | UHOH                | TAS                    |
| D51             | EUD             | UHOH                | TAS                    |
| Dan340          | DCN             | Yang et al.         | SZ                     |
| Dan4245         | DCN             | Yang et al.         | TW                     |
| Dan598          | DCN             | Yang et al.         | SZ                     |
| Dan599          | NSS             | Yang et al.         | SZ                     |
| Dong237         | DCN             | Yang et al.         | SZ                     |
| Dong46          | DCN             | Yang et al.         | SZ                     |
| EC218           | EUf             | UHOH                | TAS                    |
| EC326A          | EUD             | UHOH                | TAS                    |
| EC334           | EUD             | UHOH                | TAS                    |
| EP1             | EUf             | Cook et al.         | Strigens et al.        |
| EP2             | EUD             | UHOH                | TAS                    |
| EP55            | EUD             | UHOH                | TAS                    |
| EP64            | EUf             | UHOH                | TAS                    |
| EP65            | EUf             | UHOH                | TAS                    |
| ES40            | SS              | Yang et al.         | SZ                     |
| F045            | EUf             | UHOH                | TAS                    |

| Line name  | Heterotic group | Source <sup>a</sup> | Reference <sup>b</sup> |
|------------|-----------------|---------------------|------------------------|
| F054       | EUF             | UHOH                | TAS                    |
| F056       | EUF             | UHOH                | TAS                    |
| F070       | EUF             | UHOH                | TAS                    |
| F073       | EUF             | UHOH                | TAS                    |
| F091       | EUF             | UHOH                | TAS                    |
| F105       | EUF             | UHOH                | TAS                    |
| F109       | EUF             | UHOH                | TAS                    |
| F132       | EUF             | UHOH                | TAS                    |
| F138       | EUF             | UHOH                | TAS                    |
| F142       | EUF             | UHOH                | TAS                    |
| F150       | EUF             | UHOH                | TAS                    |
| F151       | EUF             | UHOH                | TAS                    |
| F359       | EUF             | UHOH                | TAS                    |
| F373       | EUF             | UHOH                | TAS                    |
| F47        | EUF             | UHOH                | TAS                    |
| F7028      | EUD             | UHOH                | TAS                    |
| F7059      | EUD             | UHOH                | TAS                    |
| F759       | EUF             | UHOH                | TAS                    |
| F888       | EUD             | UHOH                | TAS                    |
| F912       | EUD             | UHOH                | TAS                    |
| F924       | EUD             | UHOH                | TAS                    |
| F98902     | EUD             | UHOH                | TAS                    |
| FAPW       | SS              | Ganal et al.        | Romay et al.           |
| FBHJ       | SS              | Ganal et al.        | Romay et al.           |
| FC13       | EUF             | Ganal et al.        | WS                     |
| Florida.56 | MIS             | Ganal et al.        | Romay et al.           |
| FV18       | EUF             | UHOH                | TAS                    |
| FV181      | EUD             | UHOH                | TAS                    |
| FV324      | EUF             | UHOH                | TAS                    |
| FV331      | EUD             | Ganal et al.        | WS                     |
| Gy1007     | NSS             | Yang et al.         | SC                     |
| H105W      | SS              | Cook et al.         | Romay et al.           |
| H84        | SS              | Cook et al.         | Romay et al.           |
| H95        | NSS             | Cook et al.         | Romay et al.           |
| HP301      | MIS             | Cook et al.         | Romay et al.           |
| HTH.17     | NSS             | Yang et al.         | SZ                     |
| Hu803      | SS              | Yang et al.         | SZ                     |
| Hua83.2    | SS              | Yang et al.         | SZ                     |
| HuangC     | SS              | Yang et al.         | SZ                     |
| Hy         | SS              | Cook et al.         | MB                     |
| HYS        | DCN             | Yang et al.         | SZ                     |
| HZS        | DCN             | Yang et al.         | SZ                     |
| I29        | MIS             | Cook et al.         | Cook et al.            |
| IA2132     | MIS             | Cook et al.         | Romay et al.           |
| IA5125     | MIS             | Cook et al.         | Romay et al.           |
| IB02       | NSS             | Ganal et al.        | Romay et al.           |
| IBB14      | SS              | UHOH                | Romay et al.           |
| IDS28      | MIS             | Cook et al.         | Romay et al.           |

| Line name   | Heterotic group | Source <sup>a</sup> | Reference <sup>b</sup> |
|-------------|-----------------|---------------------|------------------------|
| IDS69       | MIS             | Cook et al.         | Romay et al.           |
| IDS91       | MIS             | Cook et al.         | Romay et al.           |
| IL101       | MIS             | Cook et al.         | Romay et al.           |
| IL14H       | MIS             | Cook et al.         | Romay et al.           |
| IL677A      | MIS             | Cook et al.         | Romay et al.           |
| Indiana4722 | MIS             | Cook et al.         | Gerdes et al.          |
| Ji53        | DCN             | Yang et al.         | SZ                     |
| Ji63        | DCN             | Yang et al.         | SZ                     |
| Ji853       | DCN             | Yang et al.         | SZ                     |
| Jiao51      | NSS             | Yang et al.         | TW                     |
| Jing24      | DCN             | Yang et al.         | SZ                     |
| K10         | SS              | Yang et al.         | HL                     |
| K12         | DCN             | Yang et al.         | SZ                     |
| Ki3         | TST             | Cook et al.         | Romay et al.           |
| L011        | EUF             | UHOH                | TAS                    |
| L032        | EUF             | UHOH                | TAS                    |
| L050        | EUF             | UHOH                | TAS                    |
| L139_Lif    | NSS             | UHOH                | Romay et al.           |
| L317        | NSS             | Cook et al.         | Gerdes et al.          |
| LH1         | SS              | Ganal et al.        | Romay et al.           |
| LH145       | SS              | Ganal et al.        | Romay et al.           |
| LH146Ht     | SS              | UHOH                | Romay et al.           |
| LH149       | SS              | Ganal et al.        | Romay et al.           |
| LH162       | NSS             | UHOH                | MBS Inc.               |
| LH196       | SS              | UHOH                | Romay et al.           |
| LH202       | SS              | UHOH                | MBS Inc.               |
| LH220Ht     | SS              | UHOH                | Romay et al.           |
| LH38        | NSS             | Ganal et al.        | Romay et al.           |
| LH57        | NSS             | Ganal et al.        | Romay et al.           |
| LH74        | SS              | Ganal et al.        | Romay et al.           |
| LP1.CMS.HT  | SS              | Ganal et al.        | Romay et al.           |
| Lv28        | DCN             | Yang et al.         | SZ                     |
| Lx9801      | DCN             | Yang et al.         | SZ                     |
| M14         | NSS             | Cook et al.         | Gerdes et al.          |
| MO113       | NSS             | Yang et al.         | SZ                     |
| Mo15W       | EUD             | UHOH                | TAS                    |
| Mo17        | NSS             | Yang et al.         | SZ                     |
| Mo1W        | EUD             | Cook et al.         | TAS                    |
| Mo44        | NSS             | Cook et al.         | Gerdes et al.          |
| MONE.112    | EUF             | UHOH                | TAS                    |
| MS153       | SS              | Cook et al.         | Gerdes et al.          |
| Nan21.3     | DCN             | Yang et al.         | SZ                     |
| NC236       | NSS             | Cook et al.         | MG                     |
| NC250       | SS              | Cook et al.         | MBS Inc.               |
| NC258       | NSS             | Cook et al.         | MBS Inc.               |
| NC260       | NSS             | Cook et al.         | Romay et al.           |
| NC290A      | NSS             | Cook et al.         | MG                     |
| NC296       | TST             | Cook et al.         | MG                     |



| Line name | Heterotic group | Source <sup>a</sup> | Reference <sup>b</sup> |
|-----------|-----------------|---------------------|------------------------|
| NC302     | TST             | Cook et al.         | MG                     |
| NC314     | SS              | Cook et al.         | Gerdes et al.          |
| NC33      | NSS             | Cook et al.         | MG                     |
| NC342     | NSS             | Cook et al.         | MG                     |
| NC352     | TST             | Cook et al.         | MG                     |
| ND2006    | SS              | UHOH                | MC                     |
| ND2014    | SS              | UHOH                | MC                     |
| ND33      | EUf             | UHOH                | TAS                    |
| NK764     | EUD             | UHOH                | TAS                    |
| NKH8431   | EUD             | UHOH                | TAS                    |
| Os420     | SS              | Cook et al.         | Romay et al.           |
| OURD.001  | EUf             | UHOH                | TAS                    |
| P024      | EUD             | UHOH                | TAS                    |
| P036      | EUD             | UHOH                | TAS                    |
| P042      | EUD             | UHOH                | TAS                    |
| P045      | EUD             | UHOH                | TAS                    |
| P047      | EUD             | UHOH                | TAS                    |
| P070      | EUD             | UHOH                | TAS                    |
| P072      | EUD             | UHOH                | TAS                    |
| P093      | EUD             | UHOH                | TAS                    |
| P094      | EUD             | UHOH                | TAS                    |
| P095      | EUD             | UHOH                | TAS                    |
| P096      | EUD             | UHOH                | TAS                    |
| P097      | EUD             | UHOH                | TAS                    |
| P106      | EUD             | UHOH                | TAS                    |
| P113      | EUD             | UHOH                | TAS                    |
| P115      | EUD             | UHOH                | TAS                    |
| P178      | NSS             | Yang et al.         | SZ                     |
| P182      | EUD             | UHOH                | TAS                    |
| P204      | EUD             | UHOH                | TAS                    |
| P210      | EUD             | UHOH                | TAS                    |
| P299      | EUD             | UHOH                | TAS                    |
| P39       | MIS             | Cook et al.         | Romay et al.           |
| P737M20   | MIS             | Ganal et al.        | Romay et al.           |
| Pa875     | SS              | Cook et al.         | Romay et al.           |
| PB18      | EUf             | UHOH                | TAS                    |
| PB261     | EUf             | UHOH                | TAS                    |
| PB268     | EUf             | UHOH                | TAS                    |
| PB57      | EUf             | UHOH                | TAS                    |
| PHB09     | EUD             | UHOH                | TAS                    |
| PHG50     | NSS             | Ganal et al.        | Romay et al.           |
| PHG83     | NSS             | UHOH                | Romay et al.           |
| PHJ40     | SS              | Ganal et al.        | Mikel et al. 2006      |
| PHN29     | SS              | UHOH                | Romay et al.           |
| PHN47     | NSS             | Ganal et al.        | MB                     |
| PHV63     | NSS             | Ganal et al.        | Romay et al.           |
| PHW17     | SS              | Ganal et al.        | Romay et al.           |
| PLS14     | EUf             | Ganal et al.        | WS                     |

| Line name | Heterotic group | Source <sup>a</sup> | Reference <sup>b</sup> |
|-----------|-----------------|---------------------|------------------------|
| PLS42     | EUf             | Ganal et al.        | WS                     |
| PP147     | EUD             | UHOH                | TAS                    |
| PP85      | EUf             | UHOH                | TAS                    |
| Q1261     | DCN             | Yang et al.         | SZ                     |
| Q381      | EUD             | UHOH                | TAS                    |
| Qi205     | SS              | Yang et al.         | SZ                     |
| Qi319     | NSS             | Yang et al.         | SZ                     |
| R229      | SS              | Cook et al.         | Gerdes et al.          |
| RZ07      | EUD             | UHOH                | TAS                    |
| S036      | EUD             | UHOH                | TAS                    |
| S044      | EUD             | UHOH                | TAS                    |
| S046      | EUD             | UHOH                | TAS                    |
| S069      | EUD             | UHOH                | TAS                    |
| S22       | NSS             | Yang et al.         | TW                     |
| S37       | TST             | Yang et al.         | SZ                     |
| SA24      | MIS             | Cook et al.         | Romay et al.           |
| SATU.245  | EUf             | UHOH                | TAS                    |
| SDp254    | EUD             | UHOH                | TAS                    |
| Sg1533    | MIS             | Cook et al.         | Romay et al.           |
| SG18      | MIS             | Cook et al.         | Romay et al.           |
| Shen137   | NSS             | Yang et al.         | SZ                     |
| Si444     | DCN             | Yang et al.         | SZ                     |
| Si446     | DCN             | Yang et al.         | SZ                     |
| STGA.151  | EUf             | UHOH                | TAS                    |
| SW92E114  | TST             | Yang et al.         | SZ                     |
| Sy1032    | NSS             | Yang et al.         | SZ                     |
| Sy1035    | NSS             | Yang et al.         | SZ                     |
| Tian77    | DCN             | Yang et al.         | TW                     |
| TIP.454.2 | MIS             | Ganal et al.        | Ganal et al.           |
| TIP.458.2 | MIS             | Ganal et al.        | Ganal et al.           |
| TIP.466.2 | MIS             | Ganal et al.        | Ganal et al.           |
| TIP.485.2 | MIS             | Ganal et al.        | Ganal et al.           |
| TIP.498.2 | MIS             | Ganal et al.        | Ganal et al.           |
| TIP.503.2 | MIS             | Ganal et al.        | Ganal et al.           |
| TIP.512.2 | MIS             | Ganal et al.        | Ganal et al.           |
| TIP.521.2 | MIS             | Ganal et al.        | Ganal et al.           |
| TIP.523.2 | MIS             | Ganal et al.        | Ganal et al.           |
| TIP.534.2 | MIS             | Ganal et al.        | Ganal et al.           |
| TT16      | DCN             | Yang et al.         | TW                     |
| TX601     | TST             | Cook et al.         | Romay et al.           |
| TZI9      | TST             | Cook et al.         | Romay et al.           |
| VACQ.053  | EUf             | UHOH                | TAS                    |
| VACQ.065  | EUf             | UHOH                | TAS                    |
| VIEY.001  | EUf             | UHOH                | TAS                    |
| W117HT    | NSS             | Cook et al.         | Gerdes et al.          |
| W138      | DCN             | Yang et al.         | SZ                     |
| W182B     | NSS             | Cook et al.         | Gerdes et al.          |
| W612S     | NSS             | UHOH                | Gerdes et al.          |

| Line name | Heterotic group | Source <sup>a</sup> | Reference <sup>b</sup> |
|-----------|-----------------|---------------------|------------------------|
| WD        | NSS             | Cook et al.         | BT                     |
| WF9       | SS              | Cook et al.         | Romay et al.           |
| WH413     | DCN             | Yang et al.         | SZ                     |
| X18.599   | NSS             | Yang et al.         | TW                     |
| X2MA22    | NSS             | Ganal et al.        | Romay et al.           |
| X3H.2     | DCN             | Yang et al.         | SZ                     |
| X5237     | DCN             | Yang et al.         | TW                     |
| X7327     | NSS             | Yang et al.         | TW                     |
| X78002A   | SS              | Ganal et al.        | Romay et al.           |
| X812      | SS              | Yang et al.         | SZ                     |
| X8902     | SS              | Yang et al.         | SZ                     |
| Xi502     | DCN             | Yang et al.         | SZ                     |
| XZ698     | NSS             | Yang et al.         | SZ                     |
| Yan414    | DCN             | Yang et al.         | SZ                     |
| Ye515     | DCN             | Yang et al.         | SZ                     |
| Yu374     | DCN             | Yang et al.         | SZ                     |
| ZaC546    | NSS             | Yang et al.         | SZ                     |
| ZH68      | SS              | Yang et al.         | SZ                     |
| Zheng22   | DCN             | Yang et al.         | HL                     |
| Zheng29   | SS              | Yang et al.         | SZ                     |
| Zheng32   | DCN             | Yang et al.         | SZ                     |
| Zheng35   | SS              | Yang et al.         | SZ                     |
| Zheng58   | SS              | Yang et al.         | HL                     |

<sup>a</sup>Source of MaizeSNP50 marker data

<sup>b</sup>Reference of heterotic group of respective line:

BT = Bill Tracy, personal communication 2013

HL = Haochuan Li, personal communication 2013

MB = Michael Blanco, personal communication 2013

MC = Marcelo Carena, personal communication 2013

MG = Major Goodman, personal communication 2013

SC = Shaojiang Chen, personal communication 2013

SZ = Blog of Shihuang Zhang (<http://chinamaize.blog.sohu.com/140461157.html>)

TAS = Tobias Schrag, personal communication 2013

TW = Tianyu Wang, personal communication 2013

WS = W. Schipprack, personal communication 2013

**Table S3** Estimated HI rate by crossing of various maize inbreds (inducers and non-inducers) to a ligueless (*lg2*) tester and phenotyping the testcross progeny for ligueless phenotype and verifying their ploidy status by flow cytometry analysis and phenotyping in the field.

| Type/Line name      | Sowed seeds | Germinated plants | Germination rate (%) | Haploids | Rate of HI (%) |
|---------------------|-------------|-------------------|----------------------|----------|----------------|
| <b>Inducers</b>     |             |                   |                      |          |                |
| UH400               | 770         | 641               | 83.25                | 49       | 7.64           |
| UH402               | 770         | 676               | 87.79                | 64       | 9.47           |
| UH600               | 770         | 640               | 83.12                | 66       | 10.31          |
| UH601               | 770         | 700               | 90.91                | 37       | 5.29           |
| UH602               | 770         | 682               | 88.57                | 42       | 6.16           |
| <b>Non-inducers</b> |             |                   |                      |          |                |
| Tx303               | 849         | 766               | 90.22                | 5        | 0.65           |
| Mo1W                | 1155        | 1095              | 94.81                | 0        | 0.00           |
| 1107                | 948         | 903               | 95.25                | 0        | 0.00           |
| 5267                | 528         | 478               | 90.53                | 0        | 0.00           |
| 5172                | 1155        | 1101              | 95.32                | 2        | 0.18           |
| L012                | 1155        | 1113              | 96.36                | 5        | 0.45           |
| L015                | 1155        | 1100              | 95.24                | 5        | 0.45           |

**Table S4** Summary of mapping information and number of genotype calls in the *qhir1*-CSI region.

| Type/Lines          | Source      | Country/<br>Region | Fraction of<br>covered regions | Sequencing depth | Length of zero<br>depth regions (bp) | Average sequencing<br>depth on genic regions | Number of<br>genotype calls |
|---------------------|-------------|--------------------|--------------------------------|------------------|--------------------------------------|----------------------------------------------|-----------------------------|
| <b>Inducer</b>      |             |                    |                                |                  |                                      |                                              |                             |
| CAU5                | CAU         | CN                 | 0.61                           | 5.83             | 19,836,208                           | 7.8                                          | 10,734,728                  |
| <b>Non-inducers</b> |             |                    |                                |                  |                                      |                                              |                             |
| Mo17                | Chia et al. | US                 | 0.4                            | 1.05             | 30,837,806                           | 1.7                                          | 163,530                     |
| CML103              | Chia et al. | MX                 | 0.39                           | 1.01             | 31,064,609                           | 1.6                                          | 175,314                     |
| 1680                | CAU         | CN                 | 0.52                           | 2.06             | 24,265,260                           | 2.6                                          | 1,797,536                   |
| Dan340              | Jiao et al. | CN                 | 0.49                           | 2.49             | 25,876,765                           | 3.4                                          | 3,248,202                   |
| Huangzaosi          | Jiao et al. | CN                 | 0.52                           | 2.69             | 24,669,071                           | 3.5                                          | 3,858,557                   |
| Teosinte            | UHOH        | MX                 | 0.54                           | 4.82             | 23,455,146                           | 8.2                                          | 9,060,665                   |
| Lo11                | UHOH        | EU                 | 0.6                            | 5.96             | 20,376,463                           | 8.2                                          | 12,674,438                  |
| D06                 | UHOH        | EU                 | 0.56                           | 6.55             | 22,489,260                           | 9.4                                          | 13,825,306                  |
| F98902              | UHOH        | EU                 | 0.73                           | 7.37             | 13,613,190                           | 9                                            | 17,106,137                  |
| Chang7-2            | Jiao et al. | CN                 | 0.68                           | 11.82            | 16,531,033                           | 17.4                                         | 17,678,568                  |
| Zheng58             | Jiao et al. | CN                 | 0.73                           | 13.01            | 13,840,317                           | 17.6                                         | 21,707,668                  |
| B73                 | UHOH        | US                 | 0.81                           | 9.1              | 9,565,259                            | 10.2                                         | 22,943,393                  |
| EP1                 | UHOH        | EU                 | 0.76                           | 30.89            | 12,233,827                           | 43.8                                         | 24,527,943                  |
| PH207               | UHOH        | EU                 | 0.76                           | 34.33            | 12,302,517                           | 47.6                                         | 25,230,133                  |

**Table S5** Genetic changes revealed by sequence comparison between CAU5 and 14 non-inducers in the *qhir11* and *qhir12* region.

| ID                          | Region                | Genetic changes <sup>a</sup> | Reference allele/sequence | CAU5 allele/sequence    | Gene                            |
|-----------------------------|-----------------------|------------------------------|---------------------------|-------------------------|---------------------------------|
| <b><i>qhir11</i> region</b> |                       |                              |                           |                         |                                 |
| 1                           | 68113989              | 1                            | C                         | T                       | GRMZM2G382717                   |
| 2                           | 68133550-<br>68133553 | 2                            | TTTA                      | -                       | GRMZM2G120587                   |
| 3                           | 68237718              | 1                            | C                         | T                       | GRMZM2G703616                   |
| 4                           | 68241406-<br>68241413 | 2                            | GCATGCAT                  | -                       | GRMZM2G471240                   |
| 5                           | 68437173-<br>68437174 | 3                            | -                         | AACCCC                  | GRMZM2G003530                   |
| 6                           | 68444236              | 1                            | G                         | T                       | GRMZM2G301743                   |
| 7                           | 68561973              | 1                            | C                         | A                       | GRMZM2G077897                   |
| 8                           | 68563560              | 1                            | G                         | T                       | GRMZM2G077897                   |
| 9                           | 68563604              | 1                            | C                         | G                       | GRMZM2G077897                   |
| <b><i>qhir12</i> region</b> |                       |                              |                           |                         |                                 |
| 10                          | 71794984-<br>71794985 | 3                            | -                         | CCGCCTCCGCCTCC<br>GCCT  | GRMZM2G035557                   |
| 11                          | 72012420              | 1                            | G                         | C                       | GRMZM5G835433                   |
| 12                          | 72012529              | 1                            | G                         | A                       | GRMZM2G313009                   |
| 13                          | 72041330-<br>72041331 | 3                            | -                         | TCCATTTCCATC            | GRMZM2G313104                   |
| 14                          | 72192659              | 1                            | C                         | T                       | AC210719.3                      |
| 15                          | 72234480-<br>72234481 | 3                            | -                         | TGCTCTCCCATCCC<br>CATCC | GRMZM2G135834                   |
| 16                          | 72235167-<br>72235168 | 3                            | -                         | GGCGGCGGC               | GRMZM2G135834                   |
| 17                          | 72402957              | 1                            | C                         | G                       | GRMZM5G837210                   |
| 18                          | 72411336              | 1                            | T                         | A                       | GRMZM2G060617                   |
| 19                          | 72618114-<br>72618115 | 3                            | -                         | ACGGTGGTC               | GRMZM2G137502                   |
| 20                          | 72703124-<br>72703136 | 4                            | CAAATATTGTTG              | GAAATGTTTGCCA           | GRMZM2G096682                   |
| 21                          | 72796140              | 1                            | T                         | C                       | AC177908.3                      |
| 22                          | 72796440              | 1                            | G                         | A                       | AC177908.3                      |
| 23                          | 72883524              | 1                            | C                         | T                       | GRMZM2G351259                   |
| 25                          | 72884024              | 1                            | A                         | T                       | GRMZM2G351259                   |
| 26                          | 72884346              | 1                            | A                         | G                       | GRMZM2G351259                   |
| 24                          | 72884006-<br>72884024 | 4                            | CGCGCCTGCGCCGCCG<br>CCA   | TGCGCCT                 | GRMZM2G351259,<br>GRMZM2G051224 |
| 27                          | 72938407              | 1                            | A                         | T                       | GRMZM2G568442                   |
| 28                          | 73101227-<br>73101228 | 3                            | -                         | CTTTGTA                 | AC212231.3_FG003                |
| 29                          | 73102017-<br>73102018 | 2                            | GGAATATATACTGTTA          | -                       | AC212231.3_FG003                |

| ID | Region                | Genetic changes <sup>a</sup> | Reference allele/sequence                       | CAU5 allele/sequence | Gene          |
|----|-----------------------|------------------------------|-------------------------------------------------|----------------------|---------------|
|    | 73102071              |                              | TATATATTACGACGTA<br>CGTACGTGTAATATAT<br>ACTGTAC |                      |               |
| 30 | 73232428-<br>73232433 | 2                            | ACAGTG                                          | -                    | GRMZM2G117930 |
| 31 | 73233044              | 1                            | G                                               | T                    | GRMZM2G552697 |
| 32 | 73344674              | 1                            | A                                               | T                    | GRMZM2G496269 |
| 33 | 73379506-<br>73379507 | 3                            | -                                               | GTGGT                | GRMZM2G172244 |
| 34 | 73512009-<br>73512012 | 2                            | TCTC                                            | -                    | GRMZM2G067371 |
| 35 | 73967088-<br>73967089 | 3                            | -                                               | ACGACAGG             | GRMZM2G125241 |
| 36 | 73967552-<br>73967553 | 3                            | -                                               | ACGCCG               | GRMZM2G125241 |
| 37 | 74264018-<br>74264022 | 2                            | ACAGA                                           | -                    | GRMZM2G036629 |
| 38 | 74274773-<br>74274775 | 2                            | TGG                                             | -                    | GRMZM2G036543 |
| 39 | 74279629              | 1                            | A                                               | G                    | GRMZM2G036484 |
| 40 | 74279670              | 1                            | G                                               | C                    | GRMZM2G036484 |
| 41 | 74279675              | 1                            | C                                               | T                    | GRMZM2G036484 |
| 42 | 74279690              | 1                            | C                                               | T                    | GRMZM2G036484 |
| 43 | 74279701              | 1                            | C                                               | T                    | GRMZM2G036484 |
| 44 | 74280722              | 1                            | T                                               | G                    | AC217311.3    |
| 45 | 74280928              | 1                            | C                                               | T                    | AC217311.3    |
| 46 | 74280937              | 1                            | T                                               | A                    | AC217311.3    |
| 47 | 74280984              | 1                            | A                                               | C                    | AC217311.3    |
| 48 | 74280988-<br>74280989 | 1                            | TG                                              | CC                   | AC217311.3    |
| 49 | 74281033              | 1                            | C                                               | T                    | AC217311.3    |
| 50 | 74281051              | 1                            | C                                               | T                    | AC217311.3    |
| 51 | 74281453              | 1                            | G                                               | A                    | AC217311.3    |
| 52 | 74281455-<br>74281456 | 1                            | AG                                              | GA                   | AC217311.3    |
| 53 | 74281466-<br>74281467 | 1                            | GG                                              | AT                   | AC217311.3    |
| 54 | 74281480              | 1                            | T                                               | G                    | AC217311.3    |
| 55 | 74281489              | 1                            | G                                               | A                    | AC217311.3    |
| 56 | 74491394              | 1                            | T                                               | G                    | GRMZM2G464580 |
| 57 | 74606411-<br>74606418 | 4                            | CGATACAG                                        | AGATACAT             | GRMZM2G086992 |
| 58 | 74608550              | 1                            | T                                               | C                    | GRMZM2G181218 |
| 59 | 74608805              | 1                            | G                                               | C                    | GRMZM2G481691 |
| 60 | 74630494              | 1                            | C                                               | G                    | GRMZM2G130121 |

| ID | Region                | Genetic changes <sup>a</sup> | Reference allele/sequence                            | CAU5 allele/sequence | Gene          |
|----|-----------------------|------------------------------|------------------------------------------------------|----------------------|---------------|
| 61 | 74769786-<br>74769830 | 2                            | GTAAACAGTTTTGTT<br>TCAGAAAACAGTTGTC<br>ACTACCCCCCACT | -                    | GRMZM2G030955 |
| 62 | 74770969              | 1                            | G                                                    | A                    | GRMZM2G030955 |
| 63 | 74785214              | 1                            | A                                                    | G                    | AC208123.3    |
| 64 | 74785457              | 1                            | A                                                    | G                    | AC208123.3    |
| 65 | 74800417              | 1                            | T                                                    | C                    | AC208123.3    |
| 66 | 74800422              | 1                            | T                                                    | C                    | AC208123.3    |
| 67 | 75143942-<br>75143951 | 2                            | ATATTGCAGG                                           | -                    | GRMZM2G042881 |
| 68 | 75145218              | 1                            | T                                                    | C                    | AC200879.4    |
| 69 | 75145236              | 1, 5                         | A                                                    | C                    | AC200879.4    |
| 70 | 75149675              | 1                            | A                                                    | G                    | GRMZM2G043141 |
| 71 | 75319146              | 1                            | T                                                    | A                    | GRMZM2G583289 |
| 72 | 75405727-<br>75405728 | 3                            | -                                                    | TCAAATAGTGT          | GRMZM2G032821 |

<sup>a</sup>Genetic changes: 1=AAC; 2=Deletion; 3=Insertion; 4=Replacement; 5=Possible splice site disruption



**Table S6** List of genes with function prediction in the *qhir11* and *qhir12* genomic regions. The highlighted genes are putative candidate genes for HI in maize.

| Gene                        | Genetic changes | B73 Allele/Sequence                                   | CAU5 Allele/Sequence | Biological function <sup>a</sup>                             | References      |
|-----------------------------|-----------------|-------------------------------------------------------|----------------------|--------------------------------------------------------------|-----------------|
| <b><i>qhir11</i> region</b> |                 |                                                       |                      |                                                              |                 |
| GRMZM2G120587               | Deletion        | TTTA                                                  | -                    | serine-type carboxypeptidase activity                        | Mitchell et al. |
| GRMZM2G471240               | Deletion        | GCATGCAT                                              | -                    | hydrolase activity                                           | Consortium TU   |
| GRMZM2G035557               | Insertion       | -                                                     | CCGCCTCCGCCTCCGCCT   | calcium ion binding                                          | Mitchell et al. |
| GRMZM2G313009               | AAC             | G                                                     | A                    | metal ion binding                                            | Mitchell et al. |
| <b><i>qhir12</i> region</b> |                 |                                                       |                      |                                                              |                 |
| GRMZM2G135834               | Insertion       | -                                                     | TGCTCTCCCATCCCCATCC  | DNA binding                                                  | Mitchell et al. |
|                             | Insertion       | -                                                     | GGCGGCGGC            |                                                              |                 |
| GRMZM2G137502               | Insertion       | -                                                     | ACGGTGGTC            | DNA binding                                                  | Mitchell et al. |
| GRMZM2G096682               | Replacement     | CAAATATTGTTTG                                         | GAAATGTTTGCCA        | amino acid binding                                           | Mitchell et al. |
| AC177908.3                  | AAC             | T                                                     | C                    | polygalacturonate 4-alpha-galacturonosyltransferase activity | Mitchell et al. |
|                             | AAC             | G                                                     | A                    |                                                              |                 |
| GRMZM2G351259               | AAC             | C                                                     | T                    | heme binding; iron ion binding;                              | Mitchell et al. |
|                             | AAC             | A                                                     | T                    | monooxygenase activity;                                      | Consortium TU   |
|                             | AAC             | A                                                     | G                    | oxidoreductase activity                                      |                 |
| GRMZM2G036629               | Deletion        | ACAGA                                                 | -                    | metal ion binding                                            | Mitchell et al. |
| GRMZM2G036543               | Deletion        | TGG                                                   | -                    | 1                                                            | Mitchell et al. |
| GRMZM2G464580               | AAC             | T                                                     | G                    | metal ion binding                                            | Mitchell et al. |
| GRMZM2G130121               | AAC             | C                                                     | G                    | ATP binding                                                  | Consortium TU   |
| GRMZM2G030955               | Deletion        | GTTAAACAGTTTTGTTTCAG<br>AAAACAGTTGTCACTACCCC<br>CCACT | -                    | zinc ion binding                                             | Mitchell et al. |
|                             | AAC             | G                                                     | A                    |                                                              |                 |

<sup>a</sup>Biological function: 1=1-(5-phosphoribosyl)-5-[(5-phosphoribosylamino) methylideneamino] imidazole-4-carboxamide isomerase activity

**Table S7** List of typical examples of introgression breeding in crop species.

| Plant Species | Target trait                        | Genes involved                                                                  | Progenitor                 | Description of major gene transmission                                                                                                                                                                                                                                                                                                                                                                                                                                                                                                                                                                                                                                                                                                                                                                        | References                                           |
|---------------|-------------------------------------|---------------------------------------------------------------------------------|----------------------------|---------------------------------------------------------------------------------------------------------------------------------------------------------------------------------------------------------------------------------------------------------------------------------------------------------------------------------------------------------------------------------------------------------------------------------------------------------------------------------------------------------------------------------------------------------------------------------------------------------------------------------------------------------------------------------------------------------------------------------------------------------------------------------------------------------------|------------------------------------------------------|
| Wheat         | reduced plant height                | Reduced height gene 8 ( <i>Rht8</i> )                                           | Japanese variety Akakomugi | <p>i) The first geographical pathway of the <i>Rht8</i> gene (from variety Akakomugi) was from Japan to Italy at the beginning of the 20th century. In the 1950s, Italian short straw varieties, mostly carriers of <i>Rht8</i> and were transferred to former Yugoslavia and to South and Central Europe, where they were used for breeding of semi-dwarf winter wheat varieties.</p> <p>ii) The second geographical pathway of <i>Rht8</i> (from variety Akakomugi) was from Japan to Italy, from Italy (by derivatives of Akakomugi) to Argentina before and during World War II (1940–45), and from Argentina to Europe and the former Soviet Union after World War II.</p> <p><b>Conclusion:</b> the <i>Rht8</i> gene was introgressed into numerous wheat varieties by different breeding programs.</p> | Borojevic & Borojevic                                |
| Wheat         | reduced plant height                | Reduced height gene 1 ( <i>Rht1</i> ) and Reduced height gene 2 ( <i>Rht2</i> ) | Japanese variety Norin 10  | <p>The Japanese wheat variety Norin 10 (source of genes <i>Rht1</i> and <i>Rht2</i>) was transferred from Japan to the United States after World War II, and from the United States to CIMMYT in Mexico. Via the breeding program of CIMMYT, the <i>Rht1</i> and <i>Rht2</i> genes were distributed all around the world, including Europe.</p> <p><b>Conclusion:</b> the <i>Rht1</i> and <i>Rht2</i> genes were introgressed into numerous wheat varieties by different breeding programs.</p>                                                                                                                                                                                                                                                                                                               | Borojevic & Borojevic                                |
| Wheat         | Imidazolinone-resistance            | Imidazolinone-resistant ( <i>IR</i> ) gene                                      | FS4                        | <p>The original mutant (FS4) and most of the early released imidazolinone-resistant cultivars carried the resistance trait on the long arm of chromosome 6 in the D genome (renamed <i>AhasL-D1</i>) (Anderson et al., 2004; Pozniak and Hucl, 2004). Using backcrossing programs, wheat lines with resistant genes of <i>AhasL-B1</i> and <i>AhasL-A1</i> were created and multiple-genome resistant cultivars have been developed.</p> <p><b>Conclusion:</b> the <i>IR</i> gene was introgressed into numerous wheat varieties by different breeding programs.</p>                                                                                                                                                                                                                                          | Hanson et al.                                        |
| Maize         | high level of lysine and tryptophan | <i>opaque2(o2)</i>                                                              | <i>opaque2(o2)</i>         | <p>The disadvantages of the original <i>o2</i> mutant include lower yields and a soft, chalky kernel. Based on the original <i>o2</i> mutant, CIMMYT developed a range of hard endosperm <i>o2</i> genotypes with better protein quality through selection, which are popularly known as quality protein maize (QPM). This was followed by the large-scale development of QPM germplasm with a wide range of genetic backgrounds, representing tropical, subtropical and highland maize germplasm and involving different maturities, grain color and texture.</p> <p><b>Conclusion:</b> the <i>o2</i> gene was introgressed into numerous maize varieties by different breeding programs.</p>                                                                                                                | Babu & Prasanna                                      |
| Rice          | Submergence tolerance               | <i>Sub1A</i>                                                                    | Indian landrace FR13A      | <p>FR13A was from Orissa, India. An international collaborative project evaluated various procedures for submergence screening, in which FR13A had best performance. Thus, it was widely used as source for developing submergence tolerant cultivars and constructing segregating populations for mapping the submergence tolerance gene. Numerous varieties of rice in Asia have been converted to submergence tolerant versions and greatly contribute to</p>                                                                                                                                                                                                                                                                                                                                              | Xu et al.; Septiningsih et al.; Bailey-Serres et al. |

| Plant Species | Target trait                           | Genes involved                                            | Progenitor               | Description of major gene transmission                                                                                                                                                                                                                                                                                                                                                                                                                                                                                                                                                                                                                                                   | References                        |
|---------------|----------------------------------------|-----------------------------------------------------------|--------------------------|------------------------------------------------------------------------------------------------------------------------------------------------------------------------------------------------------------------------------------------------------------------------------------------------------------------------------------------------------------------------------------------------------------------------------------------------------------------------------------------------------------------------------------------------------------------------------------------------------------------------------------------------------------------------------------------|-----------------------------------|
|               |                                        |                                                           |                          | increased rice production and more stable yields in these regions. Effectiveness in Africa has been verified. It is one of the real success stories of international plant breeding in the last decade.<br><b>Conclusion:</b> the <i>Sub1A</i> gene was introgressed into numerous rice cultivars by different breeding programs.                                                                                                                                                                                                                                                                                                                                                        |                                   |
| Rapeseed      | low erucic acid                        | Erucic acid genes are located on A8 and C3.               | German cultivar Liho     | The first low erucic acid rapeseed ORO, derived from a spontaneous mutant of the German spring rapeseed cultivar Liho by Keith Downey, was released in Canada in 1968. Afterwards, many new varieties derived from the source germplasm were developed in Canada, and then spread to other countries.<br><b>Conclusion:</b> the low erucic acid gene was introgressed into numerous rapeseed varieties by different breeding programs.                                                                                                                                                                                                                                                   | Delourme et al.<br>Snowdon et al. |
| Rapeseed      | low glucosinolate                      | Three major recessive genes (names are unknown currently) | Polish variety Bronowski | In 1969, the Polish spring rape variety Bronowski was identified having low glucosinolate content, and this cultivar provided the basis for an international backcrossing programme to introduce this trait into high-yielding erucic acid-free material. The result was the release in 1974 of the first 00-quality spring rapeseed variety, Tower, with zero erucic acid and low glucosinolate content, and thus began the advance of oilseed rape (canola) in the following decades to one of the most important oil crops in temperate regions.<br><b>Conclusion:</b> the low glucosinolate genes were introgressed into numerous rapeseed varieties by different breeding programs. | Snowdon et al.                    |
| Soybean       | Soybean cyst nematode (SCN) resistance | <i>rhg1-b</i>                                             | PI 88788                 | Roughly 90% of the commercially cultivated soybean varieties marketed as SCN-resistant in the central United States use the <i>rhg1-b</i> allele (haplotype), derived from the soybean line PI 88788, as the main SCN resistance locus.<br><b>Conclusion:</b> the <i>rhg1-b</i> gene was introgressed into numerous soybean varieties by different breeding programs.                                                                                                                                                                                                                                                                                                                    | Cook et al.                       |

## File S1

### History of maize haploid inducer development in the public domain

The history of *in vivo* haploid induction in maize started with observations by Emerson and Randolph in the 1930s on spontaneously occurring haploids in certain crosses (Chase 1969). Subsequently, marker stocks were developed to identify haploids in the seed or seedling stage such as Randolph's (1940) tester stock and the Purple Embryo Marker (PEM) stock derived by Nanda and Chase (1966).

Chase (1949) described the crucial influence of pollinator genotypes on the frequency of *in vivo* haploid induction. This initiated the development of new pollinators with improved haploid induction rate (HIR). The highest HIR at that time was reported by Coe (1959), who found 343 haploids in 10,616 observed plants from selfed progeny of his "Stock 6". Chumak (1979) at the Krasnodar Lukyanenko Agricultural Research Institute (KLARI) developed synthetic populations (PEM48II and others; HIR ~ 0.02 to 0.29%) on the basis of PEM and non-inducer lines and hybrids. In 1986, they observed that a hybrid from the cross of synthetic population PEM48II (HIR ~ 0.08%) and Zarodishevsky Marker Saratov (ZMS, HIR ~ 0.55 to 3.43%; Tyrnov and Zavalishina 1984) introduced from Saratov State University (SSU) has HIR of 0.27%. In 1989, Shatskaya and colleagues developed a high HIR inducer-population Zarodishevsky Marker Krasnodar (ZMK1, HIR~6 to 8%) using four lines from the cross PEM48II×ZMS. One family of inducer ZMK1 is also known as the Krasnodar Embryo Marker Synthetic (KEMS). The improved inducer ZMK1U (HIR~11 to 13%) was created by direct selection of ZMK1 (Shatskaya 2010). At SSU, besides ZMS, Zavalishina and colleagues also developed KMS (HIR ~ 3%) by crossing Brown markers with Stock 6 in 1979 (A. Zavalishina, personal communication 2014) and subsequently developed ZMS8 in 1987 (HIR ~ 8 to 10%; Zavalishina and Tyrnov 1992). In 1987, Lashermes and Beckert (1988) developed WS14 (HIR ~ 3 to 5%) from the cross Stock 6 × W23ig. These inducers were introduced into Germany, Moldova and Romania, and served as basis of further improved inducers, such as RWS (HIR ~ 8%; Röber *et al.* 2005), UH400 (HIR ~ 8%; Prigge *et al.* 2012b), LfL inducers (HIR > 10%, J. Eder, personal communication 2013), MHI (HIR ~ 7 to 9%; Chalyk 1999), and PHI inducers (HIR ~ 10 to 16%; Rotarenco *et al.* 2010). Recently, the University of Hohenheim released inducers UH600 and UH601 combining high oil content in the seeds (OC ~ 10.5 to 11.6%) with good HIR > 8% (Melchinger *et al.* 2013).

Inducer development was also conducted independently in several Asian countries. Sarkar developed

inducer ACIR (HIR ~ 3%) from a cross with Stock 6 (Sarkar *et al.* 1994). Liu and Song (2000) developed the first Chinese maize inducer CAUHOI (HIR ~ 3%) by crossing Stock 6 and Beijing High-oil synthetic in 1998. Chen continued this work and developed CAU5 (HIR ~ 8%) and CAU079 (HIR ~ 6%) by crossing UH400 and CAUHOI (Xu *et al.* 2013). The HZI inducers were also developed in China by Huangzhong Agricultural University with HIR ~ 4 to 8% (F. Qiu, personal communication 2013). CIMMYT in collaboration with the University of Hohenheim developed tropically adapted inducer lines (TAIL5, and TAIL7 to TAIL9, HIR ~ 5 to 11%) as described by Prigge *et al.* (Prigge *et al.* 2012a).

## File S2

### Source and germplasm group of 1,482 non-inducers analyzed in this study

#### 1) 93 lines from Ganai *et al.* (2011)

- EUD

A374 F252 FV331 MBS847 ND283 Tzi8 W401 X807

- EUF

AK3 CH10 D105 F471 FC13 FC24 FC25 FC26 FV2 FV283 FV286 FV4 FV71 FV79 LO3 LO32 ND36  
NYS302 PLS14 PLS27 PLS42 W85

- MIS

Florida.56 P737M20 TIP.454.2 TIP.458.2 TIP.466.2 TIP.485.2 TIP.498.2 TIP.503.2 TIP.512.2 TIP.521.2  
TIP.523.2 TIP.534.2

- NSS

CR1HT IB014 IB02 LH123HT LH156 LH38 LH39 LH52 LH54 LH57 LH59 LH60 LH82 LH85 LH93 MBNA  
NQ508 PHG39 PHG50 PHG72 PHK76 PHN47 PHR25 PHR32 PHR36 PHV63 PHV78 PHW65 PHZ51  
X2MA22

- SS

B47 FAPW FBHJ FR19 G80 LH1 LH132 LH145 LH149 LH74 LP1.CMS.HT NS701 PB80 PHG71 PHJ40  
PHR47 PHW17 PHW52 X78002A X78004

- TST: CMIL69

#### 2) 220 lines from Cook *et al.* (2012)

- EUD

B115 B73Htrhm CH9 CM37 CM7 CML287 CML91 CMV3 CO125 F44 Ky21 Ky228 M162W M37W  
Mo18W Mo1W Mo24W SC213R T8 Tx303

- EUF: CO255 EP1 F7

- MIS

HP301 I29 IA2132 IA5125 IDS28 IDS69 IDS91 IL101 IL14H IL677A Indiana4722 P39 SA24 Sg1533 SG18

- NSS

A188 A6 A659 A661 A682 B103 B2 B52 B57 B75 B97 C103 C123 CI187.2 CI31A CI90C DE.2 DE.3

DE1

DE811 GT112 H95 H99 Hi27 I205 K4 K55 L317 M14 Mo44 Mo46 Mo47 MoG MS71 Mt42 N6 NC222  
NC230 NC232 NC236 NC238 NC258 NC260 NC262 NC264 NC290A NC318 NC320 NC33 NC342 NC344  
ND246 OH40B OH43 OH43E OH7B Pa762 T232 VA102 VA14 VA17 VA22 VA35 VA59 VA85 VA99  
W117HT W153R W182B W22 W22.R.r.std WD

- SS

A239 A554 A632 A634 A635 A641 A654 A679 A680 Ab28A B10 B105 B109 B14A B164 B37 B46 B64  
B68 B76 B79 B84 CM105 CM174 H105W H49 H84 H91 Hy MS153 N192 N28HT N7A NC250 NC294  
NC306 NC310 NC314 NC324 NC326 NC328 NC368 Os420 Pa875 Pa880 PA91 R229 WF9

- TST

CML10 CML103 CML108 CML11 CML14 CML154Q CML157Q CML158Q CML218 CML220 CML238  
CML247 CML254 CML258 CML261 CML264 CML277 CML281 CML311 CML314 CML321 CML322  
CML328 CML331 CML332 CML333 CML341 CML38 CML45 CML5 CML52 CML61 CML92 Ki11 Ki14  
Ki2021 Ki21 Ki3 Ki43 Ki44 NC296 NC296A NC298 NC300 NC302 NC304 NC336 NC340 NC346 NC348  
NC350 NC352 NC354 NC356 NC358 TX601 TZI10 TZI11 TZI16 TZI18 TZI25 TZI9

### 3) 834 lines from our own database

- EUD:

A148 A158 A3 A310 A340 A347 A375 AS5707 B100 B101 B102 B106 B107 B108 B89 B98 Carg\_11430  
CG1 CL30 Co151 Co158 CO316 CQ201 CQ502 DJ7 DK11 DK3D DK4676A DK78010 DK78371A  
DKHBA1 DKMBPM DKMBST DKMDF\_13D EA1163 EA3076 EC130 EC133A EC136 EC140 EC151  
EC175 EC232 EC242C EC326A EC334 EP2 EP27 EP28 EP29 EP51 EP52 EP55 EP56 EP67 EP72 EP77  
EZ11A EZ19 EZ31 EZ37 EZ46 EZ48 F1808 F544 F670 F7009 F7019 F7025 F7028 F7038 F7057 F7058  
F7059 F7081 F748 F752 F838 F888 F904 F908 F912 F918 F922 F924 F98902 FC1852 FC1890 FV113 FV181  
FV218 FV230 FV252 FV271 FV277 FV284 FV288 FV292 FV317 FV330 FV332 FV335 FV353 FV354  
FV356 GEMS\_0092 GL27 GL62 Ia153 IOD.0663 KW5361 LAN496 Lp5 Mo15W N16 N22 N25 NC262B  
NC288 NC290 ND211 NDB8 NK764 NKH8431 nr.38\_11 Oh02 Oh33 Os426 Pa374 PA405 PB116 PB7  
PB98TR PH207 PHB09 PHG35 PHG86 PHH93 PHK29 PHT55 PHT77 PP147 Q381 RZ07 SDp254 Va26  
W117 W182E W23 W33 W59E W602S W604S W64A W79A W9 WH WJ YUBC1a D01 D06 D09 D17 D21  
D22 D23 D24 D30 D32 D403 D408 D46 D48 D51 D60 D61 D63 D64 D66 D67 D83 D851 D95 P001 P006  
P009 P017 P022 P024 P027 P029 P031 P033 P034 P036 P038 P040 P042 P043 P045 P046 P047 P048 P053

P054 P057 P060 P063 P064 P065 P066 P068 P069 P070 P071 P072 P074 P075 P079 P080 P081 P083 P084  
P085 P086 P087 P089 P091 P092 P093 P094 P095 P096 P097 P099 P100 P101 P102 P103 P104 P105 P106  
P107 P108 P110 P111 P112 P113 P114 P115 P118 P119 P120 P122 P123 P126 P127 P128 P129 P130 P131  
P133 P135 P136 P137 P140 P142 P144 P145 P146 P148 P149 P150 P154 P159 P165 P167 P182 P184 P188  
P194 P197 P202 P204 P206 P209 P210 P211 P212 P213 P214 P215 P217 P219 P223 P224 P233 P235 P239  
P245 P250 P255 P261 P271 P272 P275 P284 P286 P289 P290 P291 P299 P304 P312 P317 P330 P336 P342  
P351 P352 P353 P354 P357 PD1001H.72 PD1003H.109 PD1022H.149 PD1022H.49 PD1022H.98  
PD1023H.72 PD1113H.111 PS06522322n S002 S015 S016 S018 S020 S021 S025 S028 S033 S034 S035  
S036 S037 S040 S044 S046 S048 S049 S050 S051 S052 S053 S054 S055 S058 S060 S064 S065 S066 S067  
S069 S070 S072 S073 S074 S077 VD01 VD02 VD03

- EUF

BARE.002 BARE.017 BUGA.005 BUGA.032 BUGA.064 BUGA.084 CAMP.104 CAMP.107 CAMP.125  
CAMP.304 CH10.3 CH10.4 CH16.1\_295 CH17.3 CH19.1 CH19.3 CH22 CH27\_17 CH28\_2 CH34 CH36  
CH39 CH4.2 CH446A CH5.2 CH7.1 CH8.7 CORU.001 CORU.002 EA1027 EA1070 EA1301 EA1349  
EA2000 EA2024 EA2087 EA2841 EC209 EC212A EC214 EC218 EC22 EC237 EC23A EC243 EC244  
EC245B EC246 EC248 EC35G EC45 EC46 EC49A EC50 EC51 EP16 EP31 EP32 EP37 EP39 EP4 EP40  
EP42 EP43 EP44 EP45 EP46 EP47 EP53 EP64 EP65 EP66 EP68 EP69 EP71 EP73 EP79 EP80 EP86  
ESTE.001 EZ1 EZ10 EZ14 EZ2 EZ22 EZ3 EZ30 EZ32 EZ33 EZ38 EZ4 EZ49 EZ5 EZ51 EZ53 EZ59 F02803  
F03801 F03802 F337 F347 F350 F359 F361 F362 F363 F364 F373 F41 F45 F47 F564 F64 F657wx F7012  
F7048 F759 F810 F9003 F902 F920 FC1571 FC1772 FC201 FC209 FC21 FC23 FC30 FC352 FC46 FP1 FV1  
FV10 FV11 FV160 FV18 FV226 FV268 FV324 FV65 FV69A FV70 FV72 FV74 FV75 FV76 FV77 FV83  
FV85 GELB.104 GELB.109 GELB.A119 GELB.A203 LACA.002 LACA.004 LACA.005 LACA.006 LO33  
MONE.102 MONE.106 MONE.112 ND33 nr.469 nr.470 NY302 NY303 OURD.001 P465P PB18 PB261  
PB268 PB40 PB53 PB57 PB6R PB79\_2 PB86 PB97 PLS41 PP85 PP87 PV125 PV135 PV139 RT10 RT9  
SATU.106 SATU.131 SATU.163 SATU.203 SATU.245 SCHM.112 SCHM.133 SCHM.134 SCHM.213  
STGA.104 STGA.151 STGA.173 STGA.178 STRE.130 STRE.138 STRE.142 STRE.302 VACQ.053  
VACQ.065 VIEY.001 W617 WALL.108 WALL.175 WALL.213 WALL.316 YUBR5 YUBR6 D102 D107  
D114 D118 D131 D140 D141 D142 D143 D144 D145 D146 D147 D149 D150 D152 D157 D164 D167 D171  
D199 D305 D503 D504 D800 DE101 DK105 F005 F012 F013 F016 F018 F020 F023 F027 F030 F034 F035



F037 F038 F039 F040 F043 F045 F047 F048 F050 F052 F054 F055 F056 F057 F058 F059 F060 F061 F062  
 F066 F068 F070 F072 F073 F074 F077 F082 F083 F084 F087 F088 F090 F091 F093 F094 F096 F098 F099  
 F101 F103 F104 F105 F106 F108 F109 F110 F117 F121 F123 F124 F125 F126 F127 F128 F129 F130 F131  
 F132 F133 F134 F135 F136 F137 F138 F139.STRE F142 F145 F147 F148 F150 F151 F154 F157 F159 F160  
 F161 F162 F169 F173 F174 F178 F179 F181 F182 F183 F185 F186 F192 F195 F198 F199 FF0823.n.6.2.2.1  
 FF1002H.453 FF1008H.20 FF1023H.78 FL1002H.40 L001 L003 L005 L007 L010 L011 L012 L015 L016  
 L017 L019 L021 L023 L024 L025 L031 L032 L035 L037 L038 L041 L042 L043 L045 L046 L047 L048 L050  
 L051 L054 L055 L056 L057 L058 L059 L060

- NSS

L127\_Lif L139\_Lif LH127 LH160 LH162 LH65 ML606 OQ603 PHG29 PHG47 PHG83 PHG84 PHJ75  
 PHN37 PHP76 W606S W608S W609S W611S W612S cn1680

- SS

B104 Carg\_2369 CR14 DeKalb\_2FACC Funk\_4N506 IBB14 IBB15 LH146Ht LH196 LH202 LH220Ht  
 ND2002 ND2006 ND2014 PHN29 PHV37 PHW03 W610S

- TST

CM.GER.MPS1.P1 CM.GER.MPS1.P10 CM.GER.MPS1.P13 CM.GER.MPS1.P16 CM.GER.MPS1.P18  
 CM.GER.MPS1.P19 CM.GER.MPS1.P2 CM.GER.MPS1.P22 CM.GER.MPS1.P23 CM.GER.MPS1.P24  
 CM.GER.MPS1.P25 CM.GER.MPS1.P26 CM.GER.MPS1.P27 CM.GER.MPS1.P28 CM.GER.MPS1.P29  
 CM.GER.MPS1.P30 CM.GER.MPS1.P31 CM.GER.MPS1.P32 CM.GER.MPS1.P33 CM.GER.MPS1.P35  
 CM.GER.MPS1.P37 CM.GER.MPS1.P39 CM.GER.MPS1.P40 CM.GER.MPS1.P42 CM.GER.MPS1.P43  
 CM.GER.MPS1.P44 CM.GER.MPS1.P45 CM.GER.MPS1.P5 CM.GER.MPS1.P6 CM.GER.MPS1.P8  
 CM.GER.MPS1.P9 CML246 CML539 CZL00009 CZL0618 CZL0719 CZL0723 CZL0724 CZL074  
 VL062645 VL062655 CML494

#### 4) 335 lines from Yang *et al.* (2011)

- DCN

Chang3 Chang7.2 chuan48.2 Dan340 Dan4245 Dan598 Dong237 Dong46 HYS HZS Ji53 Ji63 Ji853 Jing24  
 K12 Lv28 Lx9801 Nan21.3 Q1261 Si444 Si446 Tian77 TT16 W138 WH413 X3H.2 X5237 Xi502 Yan414  
 Ye515 Yu374 Zheng22 Zheng32

- EUD: B113

- NSS

A619 B114 By4839 By4944 By4960 By804 By807 By809 By813 By815 By843 By855 Cheng698 CI7  
Dan3130 Dan599 DH29 Gy1007 Gy1032 Gy220 Gy237 Gy386 GY386B Gy462 Gy798 Gy923 H127 HTH.17  
JH59 Ji842 Ji846 Jiao51 L3180 Liao159 LK11 LXN MO113 Mo17 P178 Qi319 R08 R15 Ry684 Ry697 Ry713  
Ry729 Ry732 Ry737 S22 Shen135 Shen137 Sy1032 Sy1035 Sy1039 Sy1052 Sy1077 Sy1128 Sy3073 Sy998  
Sy999 TX5 X18.599 X238 X4F1 X5213 X7327 X7381 XZ698 Yu87.1 ZaC546

- SS

B11 B110 B111 B73 C8605 DH3732 ES40 HB Hu803 Hua83.2 HuangC J4112 K10 K14 K22 Liao5114 Qi205  
Shen5003 Tie7922 U8112 Wu109 X501 X7884.4Ht X81162 X812 X835b X8902 X9782 Ye107 Ye478  
Ye8001 ZH68 Zheng29 Zheng30 Zheng35 Zheng58 Zheng653

- TST

CIMBL1 CIMBL10 CIMBL100 CIMBL101 CIMBL103 CIMBL105 CIMBL106 CIMBL107 CIMBL108  
CIMBL109 CIMBL11 CIMBL110 CIMBL111 CIMBL112 CIMBL113 CIMBL114 CIMBL115 CIMBL116  
CIMBL117 CIMBL118 CIMBL119 CIMBL12 CIMBL120 CIMBL121 CIMBL122 CIMBL123 CIMBL127  
CIMBL128 CIMBL129 CIMBL13 CIMBL133 CIMBL134 CIMBL136 CIMBL138 CIMBL14 CIMBL141  
CIMBL142 CIMBL143 CIMBL144 CIMBL145 CIMBL146 CIMBL148 CIMBL150 CIMBL151 CIMBL152  
CIMBL153 CIMBL154 CIMBL156 CIMBL157 CIMBL16 CIMBL17 CIMBL18 CIMBL19 CIMBL2  
CIMBL20 CIMBL21 CIMBL22 CIMBL24 CIMBL25 CIMBL26 CIMBL28 CIMBL29 CIMBL3 CIMBL30  
CIMBL31 CIMBL32 CIMBL33 CIMBL34 CIMBL38 CIMBL39 CIMBL4 CIMBL40 CIMBL43 CIMBL44  
CIMBL46 CIMBL47 CIMBL48 CIMBL49 CIMBL5 CIMBL50 CIMBL52 CIMBL53 CIMBL55 CIMBL56  
CIMBL57 CIMBL58 CIMBL59 CIMBL6 CIMBL60 CIMBL61 CIMBL62 CIMBL63 CIMBL65 CIMBL66  
CIMBL68 CIMBL69 CIMBL7 CIMBL70 CIMBL71 CIMBL72 CIMBL73 CIMBL74 CIMBL75 CIMBL77  
CIMBL8 CIMBL80 CIMBL81 CIMBL82 CIMBL83 CIMBL84 CIMBL86 CIMBL87 CIMBL88 CIMBL89  
CIMBL9 CIMBL90 CIMBL91 CIMBL92 CIMBL93 CIMBL94 CIMBL95 CIMBL98 CIMBL99 CML113  
CML114 CML115 CML116 CML118 CML121 CML122 CML130 CML134 CML139 CML162 CML163  
CML165 CML166 CML168 CML169 CML170 CML171 CML172 CML191 CML192 CML20 CML223  
CML226 CML228 CML290 CML298 CML300 CML304 CML305 CML307 CML31 CML32 CML323  
CML324 CML325 CML326 CML327 CML338 CML360 CML361 CML364 CML408 CML411 CML412  
CML415 CML422 CML423 CML426 CML428 CML430 CML431 CML432 CML433 CML451 CML454

CML465 CML471 CML473 CML474 CML480 CML486 CML493 CML496 CML497 CML50 CML51  
CML69 S37 SW92E114 Yun46

## File S3

### Statistical tests for selective neutrality and hitchhiking of 10 segments with highest CHE scores

For each segment, we denote its two alleles as  $A$  and  $a$ . We consider inducers developed from crosses of type 1 ( $\mathbf{I} \times \mathbf{N}$ ), type 2 ( $(\mathbf{I} \times \mathbf{N}) \times (\mathbf{I} \times \mathbf{N})$ ) or type 3 ( $(\mathbf{I} \times \mathbf{N}) \times \mathbf{I}$ ), where  $\mathbf{I}$  represents an inducer genotype homozygous for presence of the  $A$  allele and  $\mathbf{N}$  is a non-inducer sampled at random from the set of non-inducers which has frequency  $p_A^*$  for allele  $A$  and frequency  $(1 - p_A^*)$  for allele  $a$ . According to the description in Supplementary Table 1, we have 11 crosses of type 1 and 2, and 8 crosses of type 3.

#### The probability of recovering genotype $AA$ in a progeny inducer

The probability of recovering genotype  $AA$  in a progeny inducer  $\mathbf{I}$  descending from one of the three type of crosses described above is given by:

$$P[\mathbf{I} = AA] = p_A^* \times 1 + (1 - p_A^*) \left( \frac{1}{2} + \Delta \right) \quad (1)$$

or 
$$P[\mathbf{I} = AA] = p_A^* \times 1 + (1 - p_A^*) \left( \frac{3}{4} + \Delta \right) \quad (2)$$

where  $\Delta$  corresponds to the change in the frequency of allele  $A$  due to directional selection for HI in the development of progeny inducers for  $\mathbf{I}$  descending from a cross of type 1 or 2 (Eqn. (1) and a cross of type 3 (Eqn.(2)).

#### Null hypothesis and alternative hypothesis

The biological hypothesis that allele  $A$  is selectively neutral, corresponds to the null hypothesis  $H_0$ :  $\Delta = 0$ , whereas the alternative hypothesis  $H_1$ :  $\Delta > 0$  corresponds to the statement that allele  $A$  was selected for and, as a result, its frequency increased.

#### Test for selection of allele $A$ at a specific locus

For a specific segment detected in the inducers, the frequency  $p_A^*$ , which corresponds to the probability that a randomly chosen non-inducer carries this haplotype, and can be directly obtained from Table 1. Thus, using Eqns. (1) and (2), the probability of observing genotype  $AA$  in a newly developed inducer at the locus under investigation is given by the expression

$$f(\Delta) = \left[ p_A^* \times 1 + (1 - p_A^*) \left( \frac{1}{2} + \Delta \right) \right]^{11} \left[ p_A^* \times 1 + (1 - p_A^*) \left( \frac{3}{4} + \Delta \right) \right]^8 \quad (3)$$

By solving the equation  $f(\Delta) = \alpha$ , we obtain the lower limit  $\Delta_u$  of the  $(1-\alpha)\%$  Clopper-Pearson confidence

interval (Clopper and Pearson 1934), corresponding to a statistical test of  $H_0$  at the significance level  $\alpha$ . If  $\Delta_u > 0$ , we reject the null hypothesis  $H_0$  based on our experimental data, indicating there is a positive selection at this locus; otherwise, we accept the null hypothesis, indicating that allele  $A$  is selectively neutral.

In this study, we used the significance level  $\alpha=0.01$  and  $0.001$  and the Bonferroni adjusted multiple testing significance level  $\alpha=0.001$  and  $0.0001$  for the top 10 segments with the highest CHE score (Table 1).

File S4: marker data of the MaizeSNP50 chip

This compressed zip file contains SNP ID numbers and locations and genotypes of 53 inducers listed in Table S1, 834 lines from our own database and 335 lines from Yang et al. (2011) listed in File S2. (.zip, 9313 KB)

Available for download as a .zip file at:

<http://www.genetics.org/lookup/suppl/doi:10.1534/genetics.115.184234/-/DC1/FileS4.zip>

File S5: Marker data of the 600k chip. This compressed zip file contains SNP ID numbers and locations and genotypes of 17 inducers indicated with the \* symbol and listed in Table S1. (.zip, 188 KB)

Available for download as a .zip file at:

<http://www.genetics.org/lookup/suppl/doi:10.1534/genetics.115.184234/-/DC1/FileS5.zip>

## Literature Cited

- Babu, R., B. M. Prasanna, 2014, Molecular breeding for quality protein maize (QPM) pp 489–505 in *Genomics of plant genetic resources*, edited by R. Tuberosa, A. Graner, E. Frison. Springer, Heidelberg.
- Bailey-Serres, J., T. Fukao, P. Ronald, A. Ismail, S. Heuer et al., 2010 Submergence tolerant rice: SUB1's journey from landrace to modern cultivar. *Rice* 3: 138–147.
- Beckert, P., M. Brinkmann, M. Beckert, 2008 A major locus expressed in the male gametophyte with incomplete penetrance is responsible for in situ gynogenesis in maize. *Theor. Appl. Genet.* 117: 581–594.
- Borojevic, K., and K. Borojevic, 2005 The transfer and history of “reduced height genes” (Rht) in wheat from Japan to Europe. *Journal of Heredity* 96: 455–459.
- Chalyk, S. T., 1999 Creating new haploid-inducing lines of maize. *Maize Genet Coop Newsletter* 73: 53–54.
- Chase, S. S., 1949 Monoploid frequencies in a commercial double cross hybrid maize, and its component single cross hybrids and inbred lines. *Genetics* 34: 328–332.
- Chase, S. S., 1969 Monoploids and monoploid-derivatives of maize (*Zea mays* L.). *Bot. Rev.* 35: 117–167.
- Chia, J.-M., C. Song, P. J. Bradbury, D. Costich, N. de Leon et al., 2012 Maize HapMap2 identifies extant variation from a genome in flux. *Nature Genetics* 44: 803–807.
- Chumak, M. V., 1979 The use of haploid in breeding maize. Proceedings of the tenth meeting of the maize and sorghum section of EUCARPIA. Varna - 17 - 19 - September.
- Clopper, C., E.S. Pearson, 1934 The use of confidence or fiducial limits illustrated in the case of the binomial. *Biometrika* 26: 404–413.
- Coe, E.H., 1959 A line of maize with high haploid frequency. *Am. Nat.* 93: 381–382.
- Consortium, T. U., 2014 UniProt: a hub for protein information. *Nucleic Acids Research* 43: D204–D212.
- Cook, D. E., T. G. Lee, X. Guo, S. Melito, K. Wang et al., 2012 Copy number variation of multiple genes at Rhg1 mediates nematode resistance in soybean. *Science (New York, N.Y.)* 338: 1206–9.
- Cook, J. P., M. D. McMullen, J. B. Holland, F. Tian, P. Bradbury et al., 2012 Genetic Architecture of Maize Kernel Composition in the Nested Association Mapping and Inbred Association Panels. *Plant Physiology* 158: 824–834.
- Delourme, R., C. Falentin, B. F. Fomeju, M. Boillot, G. Lassalle et al., 2013 High-density SNP-based genetic map development and linkage disequilibrium assessment in *Brassica napus* L. *BMC genomics* 14: 120.
- Eder, J., and S. Chalyk, 2002 In vivo haploid induction in maize. *Theoretical and Applied Genetics* 104: 703–708.
- Flint-Garcia, S. A., A. C. Thuillet, J. Yu, G. Pressoir, S. M. Romero et al., 2005 Maize association population: A high-resolution platform for quantitative trait locus dissection. *Plant Journal* 44: 1054–1064.
- Ganal, M. W., G. Durstewitz, A. Polley, A. Bérard, E. S. Buckler et al., 2011 A large maize (*zea mays* L.) SNP genotyping array: Development and germplasm genotyping, and genetic mapping to compare with the B73 reference genome. *PLoS ONE* 6.:



- Geiger, H. H., and G. A. Gordillo, 2009 Doubled haploids in hybrid maize breeding. *Maydica* 54: 485–499.
- Gerdes, J. T, C. F. Behr, J. G. Coors, W. F. Tracy, 1993 *Compilation of North American Maize Breeding Germplasm*. Crop Sci Soc of Am. Madison, USA.
- Hanson, B. D., L. Fandrich, D. L. Shaner, P. Westra, and S. J. Nissen, 2007 Recovery of imidazolinone-resistant hard red wheat lines following imazamox application. *Crop Science* 47: 2058–2066.
- Jiao, Y., H. Zhao, L. Ren, W. Song, B. Zeng et al., 2012 Genome-wide genetic changes during modern breeding of maize. *Nature Genetics* 44: 812–815.
- Lashermes, P., M. Beckert, 1988 Genetic control of maternal haploidy in maize (*Zea mays* L.) and selection of haploid inducing lines. *Theor Appl Genet* 76: 405–410.
- Liu, Z., T. Song, 2000 The breeding and identification of haploid inducer with high frequency parthenogenesis in Maize. *ACTA AGRONOMICA SINICA* 26: 570–574.
- MBS Inc, 2000 *Genetics Handbook*. Ames, Iowa, USA.
- Melchinger, A. E., W. Schipprack, T. Würschum, S. Chen, and F. Technow, 2013 Rapid and accurate identification of in vivo-induced haploid seeds based on oil content in maize. *Scientific reports, Nature* 3: 1–5.
- Mitchell, a., H.-Y. Chang, L. Daugherty, M. Fraser, S. Hunter et al., 2014 The InterPro protein families database: the classification resource after 15 years. *Nucleic Acids Research* 43: D213–D221.
- Nanda, D. K., and S. S. Chase, 1966 An Embryo Marker for Detecting Monoploids Of Maize (*Zea Mays* L.)1. *Crop Science* 6: 213.
- Nelson, P. T., 2009 Genetic and phenotypic characterization of maize germplasm resources: Ex-PVPA inbreds, NCSU inbreds, and elite exotic inbreds. PhD dissertation of North Carolina State University, Raleigh, North Carolina.
- Prigge, V., W. Schipprack, G. Mahuku, G. N. Atlin, and A. E. Melchinger, 2012a Development of in vivo haploid inducers for tropical maize breeding programs. *Euphytica* 185: 481–490.
- Prigge, V., X. Xu, L. Li, R. Babu, S. Chen et al., 2012b New Insights into the Genetics of in Vivo Induction of Maternal Haploids , the Backbone of Doubled. *Genetics* 190: 781–793.
- Randolph, L. F., 1940 Note on haploid frequencies. *Maize Genet Coop Newsletter* 14: 23–24.
- Röber, F. K., G. A. Gordillo, and H. H. Geiger, 2005 In vivo haploid induction in maize - Performance of new inducers and significance of doubled haploid lines in hybrid breeding. *Maydica* 50: 275–283.
- Romay, M. C., M. J. Millard, J. C. Glaubitz, J. A. Peiffer, K. L. Swarts et al., 2013 Comprehensive genotyping of the USA national maize inbred seed bank. *Genome biology* 14: R55.
- Rotarencu, V., G. Dicu, D. State, S. Fuia, 2010 New inducers of maternal haploids in maize. *Maize Genet Coop Newsletter* 84: 21–22.
- Sarkar, K. R., A. Pandey, P. Gayen, J.K. Madan, R. Kumar et al., 1994 Stabilization of high haploid inducer lines. *Maize Genet Coop Newsletter* 68: 64–65.
- Septiningsih, E. M., A. M. Pamplona, D. L. Sanchez, C. N. Neeraja, G. V. Vergara et al., 2009 Development of submergence-tolerant rice cultivars: The Sub1 locus and beyond. *Annals of Botany* 103: 151–160.

- Shatskaya, O. A., 2010 Haploinductors isolation in maize: three cycles of selection on high frequency of induction of matroclinal haploids. *Agricultural Biology* 5: 79–86.
- Snowdon, R. J., W. Lühs, W. Friedt, 2006 Oilseed rap, pp 55–114 in *Genome Mapping and Molecular Breeding in plants*, edited by C. Kole. Springer, Heidelberg.
- Strigens, A., C. Grieder, B. I. G. Haussmann, and A. E. Melchinger, 2012 Genetic variation among inbred lines and testcrosses of maize for early growth parameters and their relationship to final dry matter yield. *Crop Science* 52: 1084–1092.
- Tyrnov, V. S., A. N. Zavalishina, 1984 Induction of high frequency occurrence of matroclinal haploids in maize. Report of USSR Academy of Science. *Genetics* 276: 735–738.
- Xu, X., L. Li, X. Dong, W. Jin, A. E. Melchinger et al., 2013 Gametophytic and zygotic selection leads to segregation distortion through in vivo induction of a maternal haploid in maize. *J. Exp. Botany* 64: 1083–1096.
- Xu, K., X. Xu, T. Fukao, P. Canlas, R. Maghirang-Rodriguez et al., 2006 Sub1A is an ethylene-response-factor-like gene that confers submergence tolerance to rice. *Nature* 442: 705–708.
- Yang, X., S. Gao, S. Xu, Z. Zhang, B. M. Prasanna et al., 2011 Characterization of a global germplasm collection and its potential utilization for analysis of complex quantitative traits in maize. *Molecular Breeding* 28: 511–526.
- Zabirova, J.R., M.V. Chumak, O. A. Shatskaya, V. S. Scherbak, 1996 Technology of rapid mass generation of homozygous lines. *Kukuruza i sorgo* 4: 17–19.
- Zavalishina, A. N., V. S. Tyrnov, 1992 Induction of matroclinal haploidy in maize in vivo, pp221–222 in XIIIth Eucarpia Congress, Reproductive Biology and Plant Breeding. Angers, France.
